# Supplementary material for: Distinct MicroRNA Expression Signatures of Porcine Induced Pluripotent Stem Cells under Mouse and Human ESC Culture Conditions
Source: PLoS One. 2016 Jul 6;11(7):e0158655. doi: 10.1371/journal.pone.0158655 (PMC4934789; doi:10.1371/journal.pone.0158655)
Supplement: S3 File — (XLSX) [file pone.0158655.s004.xlsx]

## Sheet: mpiPSCs
SETP1	hsa-miR-744-5p
SETP2	hsa-miR-744-5p
SETP3	hsa-miR-10b-5p
SETP9	hsa-miR-423-5p
SETP11	hsa-miR-96-5p
A2M	hsa-miR-187-3p
AATK	hsa-miR-744-5p
ABAT	hsa-miR-183-5p
ABCA1	hsa-miR-96-5p
ABCA2	hsa-miR-96-5p
ABCB10	hsa-miR-183-5p
ABCB9	hsa-miR-1306-3p
ABCG1	hsa-miR-210-3p
ABCG8	hsa-miR-1306-3p
ABHD13	hsa-miR-96-5p
ABHD2	hsa-miR-103a-3p
ABI2	hsa-miR-187-3p
ABL1	hsa-miR-744-5p
ABL2	hsa-miR-187-3p
ACACA	hsa-miR-423-5p
ACAP3	hsa-miR-744-5p
ACHE	hsa-miR-187-3p
ACKR2	hsa-miR-10b-5p
ACOT13	hsa-miR-10b-5p
ACOX1	hsa-miR-10b-5p
ACPP	hsa-miR-10b-5p
ACRC	hsa-miR-10b-5p
ACSL4	hsa-miR-217
ACSL6	hsa-miR-10b-5p
ACTC1	hsa-miR-136-5p
ACVR1B	hsa-miR-210-3p
ADAM11	hsa-miR-744-5p
ADAM22	hsa-miR-744-5p
ADAMTS17	hsa-miR-744-5p
ADAMTS2	hsa-miR-1306-3p
ADAMTS5	hsa-miR-210-3p
ADAMTS6	hsa-miR-210-3p
ADAMTSL1	hsa-miR-744-5p
ADAMTSL3	hsa-miR-199a-3p
ADAP2	hsa-miR-744-5p
ADAR	hsa-miR-10b-5p
ADCY1	hsa-miR-10b-5p
ADCY5	hsa-miR-210-3p
ADCY6	hsa-miR-96-5p
ADCY9	hsa-miR-187-3p
ADH5	hsa-miR-142-5p
ADIPOQ	hsa-miR-10b-5p
ADNP	hsa-miR-187-3p
AGAP1	hsa-miR-10b-5p
AGFG2	hsa-miR-10b-5p
AGGF1	hsa-miR-10b-5p
AGO4	hsa-miR-210-3p
AGPAT6	hsa-miR-1306-3p
AGRP	hsa-miR-1306-3p
AHCYL2	hsa-miR-1306-3p
AIF1L	hsa-miR-1306-3p
AJUBA	hsa-miR-136-5p
AK4	hsa-miR-217
AKAP2	hsa-miR-217
AKAP6	hsa-miR-296-3p
AKAP7	hsa-miR-136-5p
ALDH16A1	hsa-miR-217
ALDH3B2	hsa-miR-187-3p
ALDH5A1	hsa-miR-210-3p
ALDH7A1	hsa-miR-10b-5p
ALPK3	hsa-miR-142-5p
ALX4	hsa-miR-187-3p
AMD1	hsa-miR-216a-5p
AMER2	hsa-miR-10b-5p
AMER3	hsa-miR-10b-5p
AMIGO2	hsa-miR-183-5p
AMMECR1	hsa-miR-103a-3p
AMOTL1	hsa-miR-10b-5p
ANK1	hsa-miR-10b-5p
ANKH	hsa-miR-187-3p
ANKIB1	hsa-miR-103a-3p
ANKLE1	hsa-miR-1306-3p
ANKRD13A	hsa-miR-10b-5p
ANKRD28	hsa-miR-142-5p
ANKS6	hsa-miR-744-5p
ANO2	hsa-miR-210-3p
ANTXR1	hsa-miR-296-3p
AP2A2	hsa-miR-744-5p
AP3D1	hsa-miR-744-5p
AP4S1	hsa-miR-10b-5p
APAF1	hsa-miR-504-5p
APBB2	hsa-miR-10b-5p
APLP2	hsa-miR-199a-3p
APOLD1	hsa-miR-1306-3p
APPBP2	hsa-miR-142-5p
AQP2	hsa-miR-96-5p
AQP4	hsa-miR-187-3p
ARFRP1	hsa-miR-744-5p
ARG2	hsa-miR-10b-5p
ARHGAP19	hsa-miR-103a-3p
ARHGAP31	hsa-miR-1306-3p
ARHGAP35	hsa-miR-10b-5p
ARHGEF12	hsa-miR-142-5p
ARHGEF3	hsa-miR-199a-3p
ARHGEF39	hsa-miR-423-5p
ARID4B	hsa-miR-142-5p
ARID5B	hsa-miR-182-3p
ARIH1	hsa-miR-103a-3p
ARL1	hsa-miR-10b-5p
ARL11	hsa-miR-103a-3p
ARMC7	hsa-miR-187-3p
ARMC8	hsa-miR-182-3p
ARNT	hsa-miR-10b-5p
ARSI	hsa-miR-10b-5p
ARSJ	hsa-miR-10b-5p
ARSK	hsa-miR-10b-5p
ASAP1	hsa-miR-217
ASAP2	hsa-miR-217
ASCL1	hsa-miR-210-3p
ASH1L	hsa-miR-103a-3p
ASIC1	hsa-miR-744-5p
ASTN1	hsa-miR-10b-5p
ASXL1	hsa-miR-217
ATAD3C	hsa-miR-744-5p
ATCAY	hsa-miR-10b-5p
ATF6	hsa-miR-103a-3p
ATG12	hsa-miR-183-5p
ATG16L1	hsa-miR-96-5p
ATG5	hsa-miR-187-3p
ATG7	hsa-miR-210-3p
ATP11A	hsa-miR-744-5p
ATP11C	hsa-miR-217
ATP13A3	hsa-miR-103a-3p
ATP1A4	hsa-miR-744-5p
ATP1B3	hsa-miR-216a-5p
ATP2A2	hsa-miR-744-5p
ATP2A3	hsa-miR-744-5p
ATP2B3	hsa-miR-210-3p
ATP2B4	hsa-miR-187-3p
ATP2C1	hsa-miR-183-5p
ATP5F1	hsa-miR-10b-5p
ATP6V0D2	hsa-miR-10b-5p
ATP6V1G2	hsa-miR-423-5p
ATP7B	hsa-miR-136-5p
ATP8B1	hsa-miR-216a-5p
ATP8B3	hsa-miR-504-5p
ATP9A	hsa-miR-187-3p
ATRN	hsa-miR-136-5p
ATRNL1	hsa-miR-182-3p
ATXN1	hsa-miR-199a-3p
ATXN3	hsa-miR-142-5p
ATXN7	hsa-miR-10b-5p
AUTS2	hsa-miR-183-5p
B3GNT7	hsa-miR-423-5p
B4GALNT1	hsa-miR-423-5p
B4GALT5	hsa-miR-210-3p
BACE2	hsa-miR-1306-3p
BAG5	hsa-miR-10b-5p
BAI1	hsa-miR-187-3p
BARX2	hsa-miR-187-3p
BAZ2A	hsa-miR-296-3p
BBS1	hsa-miR-744-5p
BBX	hsa-miR-10b-5p
BCAP29	hsa-miR-103a-3p
BCL10	hsa-miR-187-3p
BCL11A	hsa-miR-217
BCL11B	hsa-miR-744-5p
BCL2	hsa-miR-10b-5p
BCL2L13	hsa-miR-187-3p
BCL6	hsa-miR-187-3p
BCR	hsa-miR-10b-5p
BDH1	hsa-miR-10b-5p
BDKRB2	hsa-miR-210-3p
BDNF	hsa-miR-10b-5p
BEGAIN	hsa-miR-744-5p
BEND3	hsa-miR-10b-5p
BEND4	hsa-miR-1306-3p
BFSP1	hsa-miR-1306-3p
BGN	hsa-miR-423-5p
BHLHE22	hsa-miR-136-5p
BHLHE40	hsa-miR-103a-3p
BIN1	hsa-miR-744-5p
BLK	hsa-miR-744-5p
BLOC1S3	hsa-miR-744-5p
BLOC1S5	hsa-miR-216a-5p
BMP3	hsa-miR-136-5p
BMP6	hsa-miR-10b-5p
BMPR1B	hsa-miR-10b-5p
BRPF3	hsa-miR-96-5p
BRSK2	hsa-miR-744-5p
BRWD1	hsa-miR-96-5p
BRWD3	hsa-miR-142-5p
BSN	hsa-miR-10b-5p
BTBD9	hsa-miR-1306-3p
BTG2	hsa-miR-103a-3p
BTLA	hsa-miR-103a-3p
BTN2A1	hsa-miR-10b-5p
BTN3A1	hsa-miR-296-3p
C10orf105	hsa-miR-10b-5p
C10orf2	hsa-miR-199a-3p
C10orf68	hsa-miR-10b-5p
C11orf87	hsa-miR-744-5p
C12orf76	hsa-miR-103a-3p
C14orf119	hsa-miR-296-3p
C15orf40	hsa-miR-217
C17orf51	hsa-miR-504-5p
C18orf63	hsa-miR-182-3p
C1orf116	hsa-miR-210-3p
C1orf198	hsa-miR-182-3p
C1orf204	hsa-miR-10b-5p
C1orf21	hsa-miR-142-5p
C1QL4	hsa-miR-10b-5p
C1S	hsa-miR-187-3p
C22orf29	hsa-miR-423-5p
C22orf46	hsa-miR-504-5p
C2CD2	hsa-miR-187-3p
C2CD4A	hsa-miR-136-5p
C2orf44	hsa-miR-183-5p
C3orf18	hsa-miR-210-3p
C3orf72	hsa-miR-217
C4orf46	hsa-miR-142-5p
C5orf22	hsa-miR-96-5p
C5orf47	hsa-miR-103a-3p
C6orf132	hsa-miR-10b-5p
C6orf211	hsa-miR-216a-5p
C6orf223	hsa-miR-423-5p
C6orf25	hsa-miR-744-5p
C7orf41	hsa-miR-217
C7orf65	hsa-miR-10b-5p
C8orf86	hsa-miR-210-3p
C9orf66	hsa-miR-1306-3p
CAB39	hsa-miR-103a-3p
CABYR	hsa-miR-296-3p
CACNA1A	hsa-miR-210-3p
CACNA1C	hsa-miR-210-3p
CACNA1E	hsa-miR-10b-5p
CACNA2D4	hsa-miR-744-5p
CACNB4	hsa-miR-96-5p
CACNG8	hsa-miR-10b-5p
CADM1	hsa-miR-182-3p
CADM3	hsa-miR-423-5p
CALCR	hsa-miR-10b-5p
CALCRL	hsa-miR-96-5p
CALM3	hsa-miR-423-5p
CALML5	hsa-miR-744-5p
CALN1	hsa-miR-187-3p
CAMK2B	hsa-miR-10b-5p
CAMK2G	hsa-miR-10b-5p
CAMK2N2	hsa-miR-744-5p
CAPN15	hsa-miR-744-5p
CAPN5	hsa-miR-10b-5p
CAPN9	hsa-miR-210-3p
CAPRIN1	hsa-miR-10b-5p
CAPZA2	hsa-miR-103a-3p
CARD8	hsa-miR-187-3p
CARF	hsa-miR-1306-3p
CASP2	hsa-miR-96-5p
CASP3	hsa-miR-182-3p
CBFA2T2	hsa-miR-10b-5p
CBL	hsa-miR-10b-5p
CBX5	hsa-miR-10b-5p
CBX6	hsa-miR-744-5p
CC2D1B	hsa-miR-187-3p
CCDC102A	hsa-miR-217
CCDC150	hsa-miR-142-5p
CCDC170	hsa-miR-187-3p
CCDC50	hsa-miR-103a-3p
CCDC68	hsa-miR-210-3p
CCDC8	hsa-miR-296-3p
CCDC85A	hsa-miR-142-5p
CCDC88A	hsa-miR-10b-5p
CCDC93	hsa-miR-182-3p
CCNB3	hsa-miR-10b-5p
CCND1	hsa-miR-187-3p
CCNG1	hsa-miR-96-5p
CCNG2	hsa-miR-744-5p
CCNJ	hsa-miR-216a-5p
CCNYL1	hsa-miR-217
CD109	hsa-miR-142-5p
CD164	hsa-miR-96-5p
CD200R1	hsa-miR-216a-5p
CD209	hsa-miR-744-5p
CD22	hsa-miR-210-3p
CD276	hsa-miR-187-3p
CD44	hsa-miR-216a-5p
CD80	hsa-miR-103a-3p
CD81	hsa-miR-744-5p
CD93	hsa-miR-187-3p
CDC42BPB	hsa-miR-744-5p
CDC42EP3	hsa-miR-183-5p
CDC42SE1	hsa-miR-423-5p
CDC42SE2	hsa-miR-103a-3p
CDH19	hsa-miR-187-3p
CDH6	hsa-miR-216a-5p
CDHR3	hsa-miR-504-5p
CDIP1	hsa-miR-504-5p
CDK12	hsa-miR-103a-3p
CDK17	hsa-miR-199a-3p
CDK5R1	hsa-miR-183-5p
CDK6	hsa-miR-744-5p
CDKN1A	hsa-miR-423-5p
CDON	hsa-miR-744-5p
CDS2	hsa-miR-10b-5p
CEACAM7	hsa-miR-103a-3p
CELF1	hsa-miR-187-3p
CELF2	hsa-miR-183-5p
CEND1	hsa-miR-210-3p
CENPN	hsa-miR-136-5p
CEP170B	hsa-miR-183-5p
CEP85L	hsa-miR-10b-5p
CERK	hsa-miR-187-3p
CERS3	hsa-miR-10b-5p
CGGBP1	hsa-miR-216a-5p
CGNL1	hsa-miR-10b-5p
CHD6	hsa-miR-103a-3p
CHMP1A	hsa-miR-744-5p
CHRAC1	hsa-miR-217
CHRDL1	hsa-miR-217
CHRNA4	hsa-miR-1306-3p
CHRNB1	hsa-miR-210-3p
CHST11	hsa-miR-103a-3p
CHST4	hsa-miR-10b-5p
CITED2	hsa-miR-199a-3p
CLASP1	hsa-miR-216a-5p
CLASP2	hsa-miR-199a-3p
CLCC1	hsa-miR-10b-5p
CLCN4	hsa-miR-423-5p
CLCN5	hsa-miR-103a-3p
CLCN7	hsa-miR-423-5p
CLDN2	hsa-miR-296-3p
CLEC16A	hsa-miR-744-5p
CLEC2B	hsa-miR-10b-5p
CLIP2	hsa-miR-210-3p
CLN8	hsa-miR-10b-5p
CLTC	hsa-miR-182-3p
CLUH	hsa-miR-744-5p
CLVS1	hsa-miR-187-3p
CLYBL	hsa-miR-744-5p
CMIP	hsa-miR-199a-3p
CMTM4	hsa-miR-187-3p
CMTM6	hsa-miR-136-5p
CNEP1R1	hsa-miR-199a-3p
CNIH3	hsa-miR-103a-3p
CNN1	hsa-miR-10b-5p
CNOT11	hsa-miR-142-5p
CNOT4	hsa-miR-216a-5p
CNOT6L	hsa-miR-296-3p
CNP	hsa-miR-744-5p
CNPY1	hsa-miR-103a-3p
CNPY3	hsa-miR-10b-5p
CNST	hsa-miR-10b-5p
CNTF	hsa-miR-10b-5p
CNTN2	hsa-miR-1306-3p
CNTNAP3B	hsa-miR-142-5p
CNTNAP5	hsa-miR-210-3p
COA4	hsa-miR-96-5p
COG3	hsa-miR-217
COL12A1	hsa-miR-183-5p
COL4A4	hsa-miR-10b-5p
COL9A1	hsa-miR-216a-5p
COPS7B	hsa-miR-423-5p
CORO1A	hsa-miR-744-5p
CORO2A	hsa-miR-216a-5p
CORO2B	hsa-miR-210-3p
CORO6	hsa-miR-744-5p
COX10	hsa-miR-210-3p
CPEB2	hsa-miR-142-5p
CPEB4	hsa-miR-216a-5p
CPLX1	hsa-miR-744-5p
CPLX2	hsa-miR-210-3p
CPM	hsa-miR-187-3p
CPNE1	hsa-miR-296-3p
CPSF7	hsa-miR-96-5p
CPT1A	hsa-miR-217
CRAMP1L	hsa-miR-744-5p
CREB1	hsa-miR-10b-5p
CREB3L2	hsa-miR-744-5p
CREB5	hsa-miR-217
CREBL2	hsa-miR-10b-5p
CREBRF	hsa-miR-199a-3p
CRIM1	hsa-miR-182-3p
CRLF3	hsa-miR-10b-5p
CRTC1	hsa-miR-10b-5p
CSF1	hsa-miR-210-3p
CSN1S1	hsa-miR-183-5p
CSNK1D	hsa-miR-744-5p
CSNK1E	hsa-miR-210-3p
CSNK1G1	hsa-miR-10b-5p
CSRNP3	hsa-miR-187-3p
CTAGE1	hsa-miR-142-5p
CTDSP1	hsa-miR-423-5p
CTDSPL	hsa-miR-10b-5p
CTDSPL2	hsa-miR-142-5p
CTIF	hsa-miR-744-5p
CTNNBIP1	hsa-miR-504-5p
CTTN	hsa-miR-210-3p
CUL3	hsa-miR-210-3p
CUL5	hsa-miR-217
CWC25	hsa-miR-182-3p
CX3CL1	hsa-miR-744-5p
CXCL12	hsa-miR-744-5p
CXCL16	hsa-miR-423-5p
CYB561A3	hsa-miR-1306-3p
CYB5B	hsa-miR-744-5p
CYB5RL	hsa-miR-187-3p
CYP4V2	hsa-miR-10b-5p
CYP7B1	hsa-miR-10b-5p
CYP8B1	hsa-miR-187-3p
CYTH4	hsa-miR-10b-5p
DAB2	hsa-miR-187-3p
DAB2IP	hsa-miR-744-5p
DACH1	hsa-miR-217
DACT1	hsa-miR-217
DAK	hsa-miR-210-3p
DAP	hsa-miR-423-5p
DCAF7	hsa-miR-216a-5p
DCDC2	hsa-miR-10b-5p
DCLK3	hsa-miR-217
DCTN4	hsa-miR-10b-5p
DCUN1D4	hsa-miR-1306-3p
DDA1	hsa-miR-10b-5p
DDHD2	hsa-miR-10b-5p
DDR1	hsa-miR-744-5p
DDX23	hsa-miR-744-5p
DDX53	hsa-miR-217
DDX54	hsa-miR-423-5p
DENND1A	hsa-miR-1306-3p
DENND6A	hsa-miR-10b-5p
DEPDC1	hsa-miR-216a-5p
DES	hsa-miR-744-5p
DESI1	hsa-miR-103a-3p
DGKG	hsa-miR-136-5p
DGKZ	hsa-miR-187-3p
DHRSX	hsa-miR-183-5p
DICER1	hsa-miR-103a-3p
DIO1	hsa-miR-182-3p
DIO2	hsa-miR-199a-3p
DIRAS1	hsa-miR-744-5p
DISC1	hsa-miR-744-5p
DIXDC1	hsa-miR-96-5p
DLG3	hsa-miR-1306-3p
DLG5	hsa-miR-103a-3p
DLGAP1	hsa-miR-10b-5p
DLGAP2	hsa-miR-10b-5p
DLGAP4	hsa-miR-744-5p
DLL4	hsa-miR-744-5p
DMPK	hsa-miR-103a-3p
DMWD	hsa-miR-423-5p
DNA2	hsa-miR-217
DNAJA4	hsa-miR-199a-3p
DNAJC16	hsa-miR-744-5p
DNAJC5	hsa-miR-217
DNAL4	hsa-miR-10b-5p
DNALI1	hsa-miR-10b-5p
DNLZ	hsa-miR-210-3p
DNM2	hsa-miR-744-5p
DNMT1	hsa-miR-142-5p
DOCK1	hsa-miR-96-5p
DOK6	hsa-miR-216a-5p
DOLPP1	hsa-miR-199a-3p
DPT	hsa-miR-216a-5p
DPYSL5	hsa-miR-744-5p
DRAM1	hsa-miR-10b-5p
DRD1	hsa-miR-103a-3p
DSC3	hsa-miR-210-3p
DSCR3	hsa-miR-10b-5p
DSE	hsa-miR-187-3p
DSTYK	hsa-miR-136-5p
DTNA	hsa-miR-199a-3p
DTX3L	hsa-miR-10b-5p
DUS2	hsa-miR-504-5p
DUSP19	hsa-miR-136-5p
DUSP5	hsa-miR-10b-5p
DUSP8	hsa-miR-423-5p
DYNAP	hsa-miR-199a-3p
DYNC1LI2	hsa-miR-103a-3p
DYNLT3	hsa-miR-217
DYRK2	hsa-miR-187-3p
E2F3	hsa-miR-210-3p
EARS2	hsa-miR-136-5p
EBF2	hsa-miR-10b-5p
EBF4	hsa-miR-744-5p
ECE1	hsa-miR-1306-3p
ECEL1	hsa-miR-744-5p
EDA	hsa-miR-103a-3p
EDAR	hsa-miR-1306-3p
EDEM1	hsa-miR-504-5p
EDEM3	hsa-miR-136-5p
EEF1A2	hsa-miR-744-5p
EFCAB1	hsa-miR-744-5p
EFCAB14	hsa-miR-199a-3p
EFCAB2	hsa-miR-504-5p
EFHC1	hsa-miR-504-5p
EFNA3	hsa-miR-210-3p
EFNA5	hsa-miR-217
EFNB2	hsa-miR-187-3p
EHD1	hsa-miR-744-5p
EIF2AK2	hsa-miR-10b-5p
EIF2S1	hsa-miR-187-3p
EIF4EBP2	hsa-miR-96-5p
ELFN2	hsa-miR-504-5p
ELK4	hsa-miR-103a-3p
ELMSAN1	hsa-miR-10b-5p
ELOVL2	hsa-miR-10b-5p
ELOVL4	hsa-miR-216a-5p
ELOVL6	hsa-miR-210-3p
ELP3	hsa-miR-136-5p
ELTD1	hsa-miR-96-5p
EML6	hsa-miR-10b-5p
ENOX2	hsa-miR-210-3p
ENTPD1	hsa-miR-10b-5p
ENTPD4	hsa-miR-216a-5p
EPB41L1	hsa-miR-187-3p
EPG5	hsa-miR-187-3p
EPHA5	hsa-miR-10b-5p
EPHA7	hsa-miR-103a-3p
EPM2AIP1	hsa-miR-96-5p
EPN3	hsa-miR-10b-5p
EPPIN	hsa-miR-744-5p
EPT1	hsa-miR-216a-5p
ERAP2	hsa-miR-10b-5p
ERC1	hsa-miR-187-3p
ERCC6	hsa-miR-217
ERF	hsa-miR-744-5p
ERG	hsa-miR-187-3p
ESCO2	hsa-miR-182-3p
ESRRG	hsa-miR-10b-5p
ETS1	hsa-miR-187-3p
EVC	hsa-miR-423-5p
EVL	hsa-miR-210-3p
EXOC4	hsa-miR-744-5p
EXOC5	hsa-miR-216a-5p
EXOSC10	hsa-miR-187-3p
EXTL1	hsa-miR-744-5p
EZH1	hsa-miR-744-5p
EZH2	hsa-miR-217
EZR	hsa-miR-744-5p
F2RL1	hsa-miR-103a-3p
F7	hsa-miR-210-3p
F8A1	hsa-miR-423-5p
FAIM2	hsa-miR-744-5p
FAM101B	hsa-miR-187-3p
FAM107B	hsa-miR-744-5p
FAM111B	hsa-miR-10b-5p
FAM122B	hsa-miR-217
FAM129A	hsa-miR-199a-3p
FAM131A	hsa-miR-1306-3p
FAM131C	hsa-miR-10b-5p
FAM134A	hsa-miR-142-5p
FAM173A	hsa-miR-187-3p
FAM175B	hsa-miR-183-5p
FAM177A1	hsa-miR-1306-3p
FAM189A1	hsa-miR-744-5p
FAM196A	hsa-miR-210-3p
FAM199X	hsa-miR-199a-3p
FAM19A3	hsa-miR-187-3p
FAM19A5	hsa-miR-187-3p
FAM212B	hsa-miR-744-5p
FAM213B	hsa-miR-744-5p
FAM219A	hsa-miR-423-5p
FAM219B	hsa-miR-10b-5p
FAM32A	hsa-miR-744-5p
FAM53B	hsa-miR-744-5p
FAM63B	hsa-miR-103a-3p
FAM76B	hsa-miR-199a-3p
FAM78A	hsa-miR-744-5p
FAM84A	hsa-miR-296-3p
FAM84B	hsa-miR-10b-5p
FAM91A1	hsa-miR-182-3p
FANCF	hsa-miR-210-3p
FARP1	hsa-miR-744-5p
FASLG	hsa-miR-136-5p
FAXDC2	hsa-miR-187-3p
FBLN2	hsa-miR-744-5p
FBN1	hsa-miR-136-5p
FBN2	hsa-miR-217
FBXO10	hsa-miR-103a-3p
FBXO22	hsa-miR-10b-5p
FBXO45	hsa-miR-182-3p
FBXW11	hsa-miR-217
FBXW8	hsa-miR-744-5p
FCF1	hsa-miR-10b-5p
FCGR3B	hsa-miR-136-5p
FCHO2	hsa-miR-183-5p
FEM1A	hsa-miR-10b-5p
FEZ2	hsa-miR-182-3p
FGF2	hsa-miR-1306-3p
FGFBP3	hsa-miR-504-5p
FGFR2	hsa-miR-217
FGFRL1	hsa-miR-210-3p
FIGN	hsa-miR-10b-5p
FKBP5	hsa-miR-187-3p
FKBP7	hsa-miR-142-5p
FKBP9	hsa-miR-744-5p
FLJ22184	hsa-miR-744-5p
FLNC	hsa-miR-210-3p
FLOT2	hsa-miR-103a-3p
FLRT2	hsa-miR-187-3p
FLT1	hsa-miR-10b-5p
FLVCR2	hsa-miR-10b-5p
FLYWCH1	hsa-miR-744-5p
FMR1	hsa-miR-136-5p
FN1	hsa-miR-96-5p
FNBP1	hsa-miR-1306-3p
FNIP1	hsa-miR-216a-5p
FOXD2	hsa-miR-210-3p
FOXK1	hsa-miR-187-3p
FOXK2	hsa-miR-96-5p
FOXM1	hsa-miR-423-5p
FOXN4	hsa-miR-10b-5p
FOXO1	hsa-miR-96-5p
FOXO3	hsa-miR-10b-5p
FOXP1	hsa-miR-1306-3p
FOXP3	hsa-miR-210-3p
FOXP4	hsa-miR-423-5p
FOXQ1	hsa-miR-96-5p
FRA10AC1	hsa-miR-217
FRMD3	hsa-miR-423-5p
FSCN1	hsa-miR-10b-5p
FTSJ2	hsa-miR-210-3p
FUT1	hsa-miR-10b-5p
FXR2	hsa-miR-10b-5p
FYCO1	hsa-miR-10b-5p
FZD3	hsa-miR-199a-3p
FZD4	hsa-miR-10b-5p
GAB3	hsa-miR-187-3p
GABRB2	hsa-miR-10b-5p
GABRG1	hsa-miR-10b-5p
GALNT1	hsa-miR-10b-5p
GALNT2	hsa-miR-744-5p
GAN	hsa-miR-187-3p
GAREML	hsa-miR-744-5p
GAS7	hsa-miR-187-3p
GAS8	hsa-miR-744-5p
GATAD2A	hsa-miR-744-5p
GATAD2B	hsa-miR-10b-5p
GBP5	hsa-miR-96-5p
GCC1	hsa-miR-199a-3p
GCC2	hsa-miR-103a-3p
GCM1	hsa-miR-142-5p
GCNT1	hsa-miR-96-5p
GCNT2	hsa-miR-136-5p
GDAP2	hsa-miR-136-5p
GEMIN8	hsa-miR-210-3p
GET4	hsa-miR-210-3p
GFAP	hsa-miR-103a-3p
GFER	hsa-miR-10b-5p
GFOD2	hsa-miR-10b-5p
GFPT1	hsa-miR-136-5p
GFRA1	hsa-miR-216a-5p
GFRA2	hsa-miR-744-5p
GGA2	hsa-miR-10b-5p
GGNBP2	hsa-miR-210-3p
GIMAP6	hsa-miR-10b-5p
GIMAP8	hsa-miR-10b-5p
GINS1	hsa-miR-216a-5p
GINS3	hsa-miR-182-3p
GINS4	hsa-miR-10b-5p
GIPC1	hsa-miR-744-5p
GIT2	hsa-miR-744-5p
GJA3	hsa-miR-183-5p
GJA5	hsa-miR-10b-5p
GLRA3	hsa-miR-136-5p
GLRB	hsa-miR-217
GLS	hsa-miR-187-3p
GLUD1	hsa-miR-103a-3p
GLYCTK	hsa-miR-423-5p
GMDS	hsa-miR-744-5p
GMEB2	hsa-miR-744-5p
GNA15	hsa-miR-210-3p
GNAI2	hsa-miR-1306-3p
GNB1	hsa-miR-744-5p
GNL1	hsa-miR-10b-5p
GNPNAT1	hsa-miR-136-5p
GNPTAB	hsa-miR-296-3p
GOLGA3	hsa-miR-504-5p
GOLT1B	hsa-miR-217
GOPC	hsa-miR-10b-5p
GPANK1	hsa-miR-183-5p
GPC1	hsa-miR-744-5p
GPC3	hsa-miR-96-5p
GPI	hsa-miR-504-5p
GPM6A	hsa-miR-199a-3p
GPR114	hsa-miR-187-3p
GPR12	hsa-miR-96-5p
GPR123	hsa-miR-210-3p
GPR126	hsa-miR-217
GPR132	hsa-miR-10b-5p
GPR156	hsa-miR-187-3p
GPRC5B	hsa-miR-744-5p
GRHL2	hsa-miR-217
GRIN1	hsa-miR-744-5p
GRIN2A	hsa-miR-504-5p
GRM7	hsa-miR-296-3p
GRSF1	hsa-miR-142-5p
GTF2H1	hsa-miR-10b-5p
GTF2H2	hsa-miR-217
GTF2H2C	hsa-miR-217
GTF3C3	hsa-miR-142-5p
GTPBP10	hsa-miR-504-5p
GTPBP4	hsa-miR-136-5p
GUCY1A3	hsa-miR-217
GXYLT1	hsa-miR-96-5p
GYS1	hsa-miR-744-5p
H3F3B	hsa-miR-216a-5p
H3F3C	hsa-miR-10b-5p
H6PD	hsa-miR-10b-5p
HAP1	hsa-miR-423-5p
HARS	hsa-miR-744-5p
HBEGF	hsa-miR-96-5p
HBS1L	hsa-miR-10b-5p
HCFC1	hsa-miR-744-5p
HCN1	hsa-miR-10b-5p
HCN2	hsa-miR-744-5p
HDAC4	hsa-miR-10b-5p
HDAC8	hsa-miR-10b-5p
HDDC2	hsa-miR-183-5p
HDX	hsa-miR-216a-5p
HECTD3	hsa-miR-744-5p
HERC6	hsa-miR-10b-5p
HES2	hsa-miR-10b-5p
HGSNAT	hsa-miR-10b-5p
HIF3A	hsa-miR-210-3p
HIPK2	hsa-miR-744-5p
HLTF	hsa-miR-216a-5p
HMGA2	hsa-miR-1306-3p
HMGXB4	hsa-miR-10b-5p
HMOX1	hsa-miR-217
HNRNPC	hsa-miR-744-5p
HOXA3	hsa-miR-10b-5p
HOXB3	hsa-miR-10b-5p
HOXB9	hsa-miR-423-5p
HP1BP3	hsa-miR-10b-5p
HPCAL1	hsa-miR-744-5p
HPS4	hsa-miR-423-5p
HPSE	hsa-miR-10b-5p
HRH4	hsa-miR-10b-5p
HS2ST1	hsa-miR-142-5p
HS6ST1	hsa-miR-744-5p
HSDL1	hsa-miR-199a-3p
HSP90AA1	hsa-miR-96-5p
HTRA1	hsa-miR-217
HUNK	hsa-miR-10b-5p
HYPK	hsa-miR-199a-3p
IARS	hsa-miR-103a-3p
IBA57	hsa-miR-10b-5p
ICK	hsa-miR-10b-5p
ICMT	hsa-miR-210-3p
IFNAR1	hsa-miR-1306-3p
IFNAR2	hsa-miR-10b-5p
IGDCC4	hsa-miR-10b-5p
IGF1R	hsa-miR-187-3p
IGF2	hsa-miR-744-5p
IGF2BP1	hsa-miR-10b-5p
IKZF4	hsa-miR-199a-3p
IL11	hsa-miR-744-5p
IL17A	hsa-miR-423-5p
IL17RA	hsa-miR-504-5p
IL17RD	hsa-miR-744-5p
IL18R1	hsa-miR-136-5p
IL1RL1	hsa-miR-142-5p
IL20RB	hsa-miR-199a-3p
IL22RA2	hsa-miR-142-5p
IL36RN	hsa-miR-744-5p
IL6R	hsa-miR-10b-5p
IL6ST	hsa-miR-136-5p
IMPAD1	hsa-miR-183-5p
INHBB	hsa-miR-210-3p
INO80	hsa-miR-136-5p
INO80D	hsa-miR-210-3p
INPP5A	hsa-miR-210-3p
INPP5B	hsa-miR-187-3p
IP6K1	hsa-miR-744-5p
IPCEF1	hsa-miR-199a-3p
IPO5	hsa-miR-210-3p
IPO9	hsa-miR-744-5p
IPPK	hsa-miR-187-3p
IQCJ-SCHIP1	hsa-miR-142-5p
IQSEC1	hsa-miR-210-3p
IQSEC2	hsa-miR-744-5p
IQSEC3	hsa-miR-744-5p
IRAK4	hsa-miR-10b-5p
IRF4	hsa-miR-744-5p
IRF6	hsa-miR-96-5p
IRGQ	hsa-miR-504-5p
IRX2	hsa-miR-187-3p
ISCA1	hsa-miR-182-3p
ISLR2	hsa-miR-744-5p
ISY1	hsa-miR-1306-3p
ITPKC	hsa-miR-10b-5p
ITPR1	hsa-miR-103a-3p
ITPRIPL2	hsa-miR-142-5p
ITSN1	hsa-miR-10b-5p
JAKMIP3	hsa-miR-187-3p
JHDM1D	hsa-miR-103a-3p
JKAMP	hsa-miR-10b-5p
JRKL	hsa-miR-216a-5p
KANK1	hsa-miR-10b-5p
KBTBD11	hsa-miR-187-3p
KBTBD12	hsa-miR-10b-5p
KBTBD13	hsa-miR-10b-5p
KBTBD6	hsa-miR-183-5p
KCNA2	hsa-miR-187-3p
KCNA6	hsa-miR-10b-5p
KCNAB3	hsa-miR-744-5p
KCNC1	hsa-miR-744-5p
KCND2	hsa-miR-217
KCNE1L	hsa-miR-1306-3p
KCNH8	hsa-miR-199a-3p
KCNIP3	hsa-miR-423-5p
KCNJ1	hsa-miR-744-5p
KCNJ13	hsa-miR-199a-3p
KCNJ15	hsa-miR-210-3p
KCNK2	hsa-miR-504-5p
KCNK5	hsa-miR-504-5p
KCNK9	hsa-miR-10b-5p
KCNMB1	hsa-miR-183-5p
KCNQ2	hsa-miR-744-5p
KCNQ5	hsa-miR-1306-3p
KCTD11	hsa-miR-210-3p
KCTD12	hsa-miR-744-5p
KCTD18	hsa-miR-10b-5p
KDM3A	hsa-miR-199a-3p
KHNYN	hsa-miR-10b-5p
KIAA0141	hsa-miR-199a-3p
KIAA0247	hsa-miR-10b-5p
KIAA0319	hsa-miR-182-3p
KIAA0319L	hsa-miR-744-5p
KIAA0368	hsa-miR-142-5p
KIAA0895	hsa-miR-199a-3p
KIAA0930	hsa-miR-210-3p
KIAA1244	hsa-miR-1306-3p
KIAA1462	hsa-miR-744-5p
KIAA1549	hsa-miR-10b-5p
KIAA1549L	hsa-miR-136-5p
KIAA1644	hsa-miR-187-3p
KIAA1755	hsa-miR-210-3p
KIAA1841	hsa-miR-1306-3p
KIAA1958	hsa-miR-187-3p
KIAA2018	hsa-miR-216a-5p
KIAA2022	hsa-miR-423-5p
KIF11	hsa-miR-1306-3p
KIF21B	hsa-miR-216a-5p
KIF23	hsa-miR-103a-3p
KIF3A	hsa-miR-10b-5p
KIF5A	hsa-miR-210-3p
KIF5C	hsa-miR-103a-3p
KIRREL	hsa-miR-10b-5p
KLF10	hsa-miR-744-5p
KLF11	hsa-miR-10b-5p
KLF13	hsa-miR-10b-5p
KLF5	hsa-miR-217
KLF7	hsa-miR-187-3p
KLHL13	hsa-miR-182-3p
KLHL15	hsa-miR-142-5p
KLHL21	hsa-miR-10b-5p
KLHL23	hsa-miR-183-5p
KLHL29	hsa-miR-10b-5p
KLHL30	hsa-miR-10b-5p
KLHL32	hsa-miR-96-5p
KLHL36	hsa-miR-744-5p
KLHL7	hsa-miR-96-5p
KLRD1	hsa-miR-187-3p
KMT2A	hsa-miR-136-5p
KPNA4	hsa-miR-217
KRAS	hsa-miR-217
KRIT1	hsa-miR-216a-5p
KRT71	hsa-miR-744-5p
KRT82	hsa-miR-423-5p
LAMP2	hsa-miR-187-3p
LAMTOR3	hsa-miR-216a-5p
LARP4B	hsa-miR-744-5p
LBR	hsa-miR-504-5p
LCA5	hsa-miR-10b-5p
LCOR	hsa-miR-217
LENG8	hsa-miR-744-5p
LEPR	hsa-miR-217
LEPROT	hsa-miR-187-3p
LGALSL	hsa-miR-10b-5p
LHPP	hsa-miR-10b-5p
LIFR	hsa-miR-142-5p
LMAN2L	hsa-miR-296-3p
LMBR1	hsa-miR-210-3p
LMF1	hsa-miR-423-5p
LMLN	hsa-miR-296-3p
LMNB2	hsa-miR-744-5p
LMTK2	hsa-miR-216a-5p
LMX1B	hsa-miR-210-3p
LOC400682	hsa-miR-10b-5p
LONRF2	hsa-miR-187-3p
LOX	hsa-miR-183-5p
LPCAT2	hsa-miR-142-5p
LPGAT1	hsa-miR-10b-5p
LPIN3	hsa-miR-504-5p
LPO	hsa-miR-744-5p
LPP	hsa-miR-744-5p
LPPR4	hsa-miR-96-5p
LPPR5	hsa-miR-10b-5p
LRCH2	hsa-miR-96-5p
LRFN1	hsa-miR-187-3p
LRP2BP	hsa-miR-1306-3p
LRP4	hsa-miR-142-5p
LRP6	hsa-miR-183-5p
LRRC15	hsa-miR-423-5p
LRRC19	hsa-miR-10b-5p
LRRC55	hsa-miR-10b-5p
LRRC8A	hsa-miR-210-3p
LRRC8B	hsa-miR-10b-5p
LSM14B	hsa-miR-182-3p
LSS	hsa-miR-10b-5p
LTBP2	hsa-miR-182-3p
LTN1	hsa-miR-216a-5p
LUC7L3	hsa-miR-217
LURAP1	hsa-miR-504-5p
LYNX1	hsa-miR-10b-5p
LYPLA1	hsa-miR-199a-3p
LYPLA2	hsa-miR-744-5p
LYRM2	hsa-miR-296-3p
LYRM7	hsa-miR-10b-5p
LZTS1	hsa-miR-10b-5p
MAB21L3	hsa-miR-210-3p
MAFK	hsa-miR-187-3p
MAMDC2	hsa-miR-136-5p
MAN1B1	hsa-miR-187-3p
MAP2K2	hsa-miR-744-5p
MAP2K4	hsa-miR-1306-3p
MAP3K13	hsa-miR-187-3p
MAP3K2	hsa-miR-142-5p
MAP3K4	hsa-miR-199a-3p
MAP3K5	hsa-miR-199a-3p
MAP3K7	hsa-miR-10b-5p
MAP4	hsa-miR-10b-5p
MAP6D1	hsa-miR-216a-5p
MAPK1	hsa-miR-210-3p
MAPK12	hsa-miR-10b-5p
MAPK8	hsa-miR-187-3p
MAPK8IP1	hsa-miR-183-5p
MAPK8IP3	hsa-miR-744-5p
MAPKAPK3	hsa-miR-423-5p
MASP1	hsa-miR-136-5p
MAT1A	hsa-miR-10b-5p
MAU2	hsa-miR-187-3p
MBLAC2	hsa-miR-96-5p
MBNL1	hsa-miR-183-5p
MBTD1	hsa-miR-210-3p
MCM8	hsa-miR-210-3p
MCMDC2	hsa-miR-1306-3p
MDGA1	hsa-miR-744-5p
MDM2	hsa-miR-10b-5p
MDM4	hsa-miR-504-5p
MECP2	hsa-miR-1306-3p
MED12L	hsa-miR-10b-5p
MED26	hsa-miR-103a-3p
MEF2C	hsa-miR-183-5p
MEF2D	hsa-miR-210-3p
MEIS2	hsa-miR-199a-3p
MEN1	hsa-miR-744-5p
MESDC2	hsa-miR-504-5p
METTL13	hsa-miR-210-3p
METTL21A	hsa-miR-423-5p
METTL4	hsa-miR-182-3p
METTL9	hsa-miR-142-5p
MFAP3	hsa-miR-136-5p
MFI2	hsa-miR-744-5p
MFSD4	hsa-miR-210-3p
MGAT5	hsa-miR-10b-5p
MGAT5B	hsa-miR-744-5p
MGRN1	hsa-miR-210-3p
MIA3	hsa-miR-183-5p
MICAL2	hsa-miR-744-5p
MICB	hsa-miR-10b-5p
MID1	hsa-miR-187-3p
MIDN	hsa-miR-1306-3p
MIER2	hsa-miR-744-5p
MIER3	hsa-miR-136-5p
MKI67	hsa-miR-10b-5p
MKLN1	hsa-miR-142-5p
MKRN2	hsa-miR-423-5p
MKX	hsa-miR-1306-3p
MLLT6	hsa-miR-744-5p
MME	hsa-miR-10b-5p
MMP14	hsa-miR-10b-5p
MMP25	hsa-miR-744-5p
MMS22L	hsa-miR-187-3p
MN1	hsa-miR-103a-3p
MNT	hsa-miR-187-3p
MOB4	hsa-miR-142-5p
MOCS1	hsa-miR-744-5p
MON2	hsa-miR-10b-5p
MORF4L1	hsa-miR-96-5p
MPST	hsa-miR-744-5p
MRAS	hsa-miR-504-5p
MRI1	hsa-miR-744-5p
MRO	hsa-miR-10b-5p
MRPL42	hsa-miR-96-5p
MRPL43	hsa-miR-187-3p
MRPS25	hsa-miR-10b-5p
MS4A7	hsa-miR-142-5p
MSANTD1	hsa-miR-210-3p
MSL3	hsa-miR-10b-5p
MT1X	hsa-miR-296-3p
MTAP	hsa-miR-187-3p
MTDH	hsa-miR-1306-3p
MTHFR	hsa-miR-744-5p
MTM1	hsa-miR-10b-5p
MTMR1	hsa-miR-744-5p
MTMR3	hsa-miR-10b-5p
MTMR6	hsa-miR-10b-5p
MTO1	hsa-miR-216a-5p
MTPN	hsa-miR-136-5p
MTR	hsa-miR-423-5p
MTUS1	hsa-miR-10b-5p
MUC12	hsa-miR-1306-3p
MURC	hsa-miR-217
MXRA5	hsa-miR-187-3p
MYBL1	hsa-miR-103a-3p
MYCT1	hsa-miR-10b-5p
MYD88	hsa-miR-187-3p
MYF6	hsa-miR-183-5p
MYH11	hsa-miR-187-3p
MYLK4	hsa-miR-216a-5p
MYO1B	hsa-miR-10b-5p
MYO1D	hsa-miR-744-5p
MYO5B	hsa-miR-10b-5p
MYO6	hsa-miR-142-5p
MYO7B	hsa-miR-744-5p
MYOCD	hsa-miR-210-3p
MYRIP	hsa-miR-96-5p
MYT1L	hsa-miR-210-3p
N4BP1	hsa-miR-103a-3p
N4BP3	hsa-miR-423-5p
NAA25	hsa-miR-199a-3p
NAA60	hsa-miR-10b-5p
NAB1	hsa-miR-217
NACC1	hsa-miR-744-5p
NALCN	hsa-miR-744-5p
NANOS1	hsa-miR-96-5p
NAP1L1	hsa-miR-217
NARS2	hsa-miR-183-5p
NAT16	hsa-miR-423-5p
NAT8L	hsa-miR-744-5p
NAV1	hsa-miR-187-3p
NBL1	hsa-miR-744-5p
NCAM1	hsa-miR-210-3p
NCF4	hsa-miR-10b-5p
NCK2	hsa-miR-142-5p
NCLN	hsa-miR-744-5p
NCOR2	hsa-miR-10b-5p
NCR3LG1	hsa-miR-296-3p
NDUFA4	hsa-miR-10b-5p
NEDD1	hsa-miR-142-5p
NEDD4	hsa-miR-199a-3p
NEDD4L	hsa-miR-10b-5p
NEDD9	hsa-miR-103a-3p
NEK1	hsa-miR-142-5p
NEK6	hsa-miR-10b-5p
NEK7	hsa-miR-1306-3p
NET1	hsa-miR-199a-3p
NETO1	hsa-miR-10b-5p
NEURL1B	hsa-miR-210-3p
NEUROD4	hsa-miR-96-5p
NEUROG2	hsa-miR-187-3p
NF1	hsa-miR-103a-3p
NF2	hsa-miR-10b-5p
NFAM1	hsa-miR-423-5p
NFASC	hsa-miR-10b-5p
NFAT5	hsa-miR-210-3p
NFATC2	hsa-miR-10b-5p
NFE2L1	hsa-miR-10b-5p
NFIA	hsa-miR-103a-3p
NFIC	hsa-miR-744-5p
NFIX	hsa-miR-10b-5p
NFKB1	hsa-miR-183-5p
NFKBIZ	hsa-miR-187-3p
NGFR	hsa-miR-744-5p
NHLH1	hsa-miR-103a-3p
NHP2L1	hsa-miR-10b-5p
NHS	hsa-miR-210-3p
NKPD1	hsa-miR-10b-5p
NKTR	hsa-miR-10b-5p
NKX3-1	hsa-miR-10b-5p
NKX3-2	hsa-miR-744-5p
NLGN2	hsa-miR-96-5p
NLN	hsa-miR-187-3p
NMNAT2	hsa-miR-210-3p
NOM1	hsa-miR-10b-5p
NONO	hsa-miR-10b-5p
NOS1	hsa-miR-10b-5p
NOS1AP	hsa-miR-136-5p
NOTCH2	hsa-miR-103a-3p
NPAP1	hsa-miR-216a-5p
NPHS2	hsa-miR-217
NPTX1	hsa-miR-744-5p
NPTX2	hsa-miR-744-5p
NPTXR	hsa-miR-1306-3p
NR2F2	hsa-miR-10b-5p
NR3C1	hsa-miR-216a-5p
NR3C2	hsa-miR-210-3p
NR4A3	hsa-miR-10b-5p
NR6A1	hsa-miR-10b-5p
NRCAM	hsa-miR-1306-3p
NRG2	hsa-miR-744-5p
NRGN	hsa-miR-744-5p
NRP2	hsa-miR-10b-5p
NRTN	hsa-miR-744-5p
NSG1	hsa-miR-103a-3p
NSUN5	hsa-miR-210-3p
NT5DC1	hsa-miR-210-3p
NT5DC3	hsa-miR-10b-5p
NTF3	hsa-miR-296-3p
NTN1	hsa-miR-187-3p
NTN4	hsa-miR-96-5p
NTNG2	hsa-miR-744-5p
NTRK2	hsa-miR-1306-3p
NUBPL	hsa-miR-136-5p
NUCKS1	hsa-miR-136-5p
NUDCD3	hsa-miR-1306-3p
NUDT4	hsa-miR-183-5p
NUFIP1	hsa-miR-142-5p
NUP43	hsa-miR-142-5p
NUP50	hsa-miR-210-3p
NUSAP1	hsa-miR-504-5p
NXF2	hsa-miR-1306-3p
NXF2B	hsa-miR-1306-3p
OAS3	hsa-miR-183-5p
OBSCN	hsa-miR-210-3p
ODF2	hsa-miR-103a-3p
ODF2L	hsa-miR-103a-3p
OGDH	hsa-miR-744-5p
OGG1	hsa-miR-182-3p
ONECUT2	hsa-miR-10b-5p
OPCML	hsa-miR-1306-3p
OPN4	hsa-miR-10b-5p
OPRL1	hsa-miR-744-5p
OR51E1	hsa-miR-296-3p
ORAI2	hsa-miR-187-3p
OSBPL5	hsa-miR-744-5p
OSBPL7	hsa-miR-744-5p
OSCAR	hsa-miR-423-5p
OTOGL	hsa-miR-103a-3p
OTUB2	hsa-miR-210-3p
OTUD3	hsa-miR-136-5p
OTUD7B	hsa-miR-217
OTX1	hsa-miR-744-5p
OVOL1	hsa-miR-210-3p
OXTR	hsa-miR-210-3p
P2RX1	hsa-miR-10b-5p
P2RY2	hsa-miR-744-5p
PA2G4	hsa-miR-423-5p
PACS1	hsa-miR-423-5p
PADI1	hsa-miR-1306-3p
PADI2	hsa-miR-744-5p
PAFAH1B1	hsa-miR-10b-5p
PAGE1	hsa-miR-187-3p
PALM2	hsa-miR-10b-5p
PAPD5	hsa-miR-10b-5p
PAPD7	hsa-miR-744-5p
PAPPA	hsa-miR-1306-3p
PAQR3	hsa-miR-199a-3p
PAQR8	hsa-miR-136-5p
PARK2	hsa-miR-187-3p
PAX2	hsa-miR-744-5p
PCBD1	hsa-miR-10b-5p
PCDH9	hsa-miR-142-5p
PCDHB16	hsa-miR-504-5p
PCGF3	hsa-miR-10b-5p
PCGF5	hsa-miR-103a-3p
PCGF6	hsa-miR-183-5p
PCSK2	hsa-miR-10b-5p
PCSK5	hsa-miR-136-5p
PDCD6IP	hsa-miR-217
PDCL	hsa-miR-504-5p
PDE10A	hsa-miR-210-3p
PDE12	hsa-miR-10b-5p
PDE3A	hsa-miR-187-3p
PDE4A	hsa-miR-10b-5p
PDE4B	hsa-miR-199a-3p
PDE4C	hsa-miR-187-3p
PDE5A	hsa-miR-217
PDGFRB	hsa-miR-744-5p
PDHA1	hsa-miR-10b-5p
PDK2	hsa-miR-210-3p
PDK3	hsa-miR-103a-3p
PDPK1	hsa-miR-744-5p
PDPN	hsa-miR-1306-3p
PDSS2	hsa-miR-216a-5p
PDXK	hsa-miR-187-3p
PDZD4	hsa-miR-210-3p
PDZD8	hsa-miR-10b-5p
PELI3	hsa-miR-744-5p
PEX10	hsa-miR-210-3p
PEX19	hsa-miR-183-5p
PEX26	hsa-miR-10b-5p
PEX5L	hsa-miR-10b-5p
PFKFB4	hsa-miR-10b-5p
PFN2	hsa-miR-296-3p
PGM2L1	hsa-miR-217
PGPEP1	hsa-miR-10b-5p
PGR	hsa-miR-216a-5p
PGRMC2	hsa-miR-423-5p
PHACTR2	hsa-miR-103a-3p
PHACTR4	hsa-miR-96-5p
PHF17	hsa-miR-10b-5p
PHF2	hsa-miR-744-5p
PHF20	hsa-miR-103a-3p
PHF20L1	hsa-miR-10b-5p
PHF6	hsa-miR-217
PHKA1	hsa-miR-199a-3p
PHKA2	hsa-miR-744-5p
PHKB	hsa-miR-216a-5p
PHLPP2	hsa-miR-10b-5p
PI15	hsa-miR-216a-5p
PIGK	hsa-miR-10b-5p
PIGR	hsa-miR-10b-5p
PIK3C2G	hsa-miR-10b-5p
PIK3CD	hsa-miR-182-3p
PIK3R1	hsa-miR-136-5p
PIK3R3	hsa-miR-10b-5p
PIK3R5	hsa-miR-210-3p
PIN4	hsa-miR-10b-5p
PIP4K2B	hsa-miR-744-5p
PITPNA	hsa-miR-10b-5p
PKD2	hsa-miR-183-5p
PKIA	hsa-miR-423-5p
PKNOX1	hsa-miR-10b-5p
PLA1A	hsa-miR-10b-5p
PLA2G12A	hsa-miR-187-3p
PLA2G15	hsa-miR-744-5p
PLAG1	hsa-miR-183-5p
PLAGL1	hsa-miR-103a-3p
PLAT	hsa-miR-296-3p
PLCB1	hsa-miR-423-5p
PLCXD1	hsa-miR-10b-5p
PLD4	hsa-miR-744-5p
PLEK	hsa-miR-1306-3p
PLEKHA2	hsa-miR-10b-5p
PLEKHA5	hsa-miR-216a-5p
PLEKHN1	hsa-miR-10b-5p
PLIN1	hsa-miR-199a-3p
PLIN4	hsa-miR-744-5p
PLOD2	hsa-miR-96-5p
PLOD3	hsa-miR-187-3p
PLP1	hsa-miR-10b-5p
PLRG1	hsa-miR-216a-5p
PLSCR1	hsa-miR-216a-5p
PLXDC1	hsa-miR-187-3p
PLXNA2	hsa-miR-187-3p
PML	hsa-miR-423-5p
PNKD	hsa-miR-423-5p
PNMA5	hsa-miR-744-5p
POFUT2	hsa-miR-504-5p
POLD3	hsa-miR-103a-3p
POLM	hsa-miR-217
POLR1C	hsa-miR-183-5p
POLR3H	hsa-miR-744-5p
POMT2	hsa-miR-210-3p
POP1	hsa-miR-10b-5p
POTEM	hsa-miR-136-5p
POU2AF1	hsa-miR-10b-5p
POU2F2	hsa-miR-187-3p
POU4F2	hsa-miR-103a-3p
PPARA	hsa-miR-103a-3p
PPARGC1B	hsa-miR-10b-5p
PPAT	hsa-miR-216a-5p
PPIE	hsa-miR-136-5p
PPIL1	hsa-miR-103a-3p
PPM1A	hsa-miR-10b-5p
PPM1B	hsa-miR-217
PPP1CB	hsa-miR-210-3p
PPP1R18	hsa-miR-136-5p
PPP1R2	hsa-miR-210-3p
PPP1R3B	hsa-miR-210-3p
PPP1R3C	hsa-miR-217
PPP1R3D	hsa-miR-1306-3p
PPP1R7	hsa-miR-187-3p
PPP1R9A	hsa-miR-210-3p
PPP2R2A	hsa-miR-199a-3p
PPP2R5B	hsa-miR-744-5p
PPP5C	hsa-miR-744-5p
PPP6R2	hsa-miR-103a-3p
PQLC3	hsa-miR-216a-5p
PRAF2	hsa-miR-423-5p
PRDM12	hsa-miR-744-5p
PRELP	hsa-miR-10b-5p
PREPL	hsa-miR-210-3p
PRIMA1	hsa-miR-10b-5p
PRKAA2	hsa-miR-187-3p
PRKAB1	hsa-miR-744-5p
PRKACA	hsa-miR-10b-5p
PRKACG	hsa-miR-10b-5p
PRKAR1A	hsa-miR-96-5p
PRKCA	hsa-miR-504-5p
PRKCB	hsa-miR-199a-3p
PRKG1	hsa-miR-142-5p
PRKRIR	hsa-miR-183-5p
PRKX	hsa-miR-10b-5p
PRLR	hsa-miR-10b-5p
PRMT2	hsa-miR-210-3p
PRND	hsa-miR-10b-5p
PROSC	hsa-miR-96-5p
PROSER1	hsa-miR-217
PRPF4	hsa-miR-187-3p
PRPF4B	hsa-miR-142-5p
PRPS2	hsa-miR-103a-3p
PRR14L	hsa-miR-187-3p
PRRG1	hsa-miR-103a-3p
PRRT2	hsa-miR-744-5p
PRSS12	hsa-miR-103a-3p
PRTG	hsa-miR-10b-5p
PSAP	hsa-miR-210-3p
PSAPL1	hsa-miR-10b-5p
PSD2	hsa-miR-199a-3p
PTBP1	hsa-miR-210-3p
PTCD1	hsa-miR-1306-3p
PTCD3	hsa-miR-10b-5p
PTGER3	hsa-miR-96-5p
PTGS2	hsa-miR-183-5p
PTP4A1	hsa-miR-142-5p
PTPDC1	hsa-miR-136-5p
PTPLAD1	hsa-miR-216a-5p
PTPN11	hsa-miR-187-3p
PTPN4	hsa-miR-744-5p
PTPN9	hsa-miR-96-5p
PTPRT	hsa-miR-10b-5p
PTRF	hsa-miR-187-3p
PURB	hsa-miR-103a-3p
PVR	hsa-miR-10b-5p
PVRL1	hsa-miR-187-3p
PVRL2	hsa-miR-199a-3p
PYHIN1	hsa-miR-136-5p
QKI	hsa-miR-199a-3p
RAB11FIP4	hsa-miR-504-5p
RAB11FIP5	hsa-miR-187-3p
RAB15	hsa-miR-10b-5p
RAB27B	hsa-miR-210-3p
RAB35	hsa-miR-10b-5p
RAB3B	hsa-miR-136-5p
RAB3IL1	hsa-miR-187-3p
RAB7A	hsa-miR-210-3p
RAB8B	hsa-miR-183-5p
RAB9B	hsa-miR-210-3p
RABL3	hsa-miR-217
RACGAP1	hsa-miR-103a-3p
RALA	hsa-miR-183-5p
RANGAP1	hsa-miR-744-5p
RAP2B	hsa-miR-142-5p
RAPGEF1	hsa-miR-744-5p
RAPGEF6	hsa-miR-217
RAPGEFL1	hsa-miR-103a-3p
RAPH1	hsa-miR-199a-3p
RARB	hsa-miR-216a-5p
RASA4	hsa-miR-187-3p
RASAL2	hsa-miR-187-3p
RASGRF2	hsa-miR-744-5p
RASSF1	hsa-miR-504-5p
RASSF6	hsa-miR-217
RAX	hsa-miR-744-5p
RB1	hsa-miR-199a-3p
RB1CC1	hsa-miR-10b-5p
RBBP5	hsa-miR-1306-3p
RBBP8	hsa-miR-142-5p
RBFOX1	hsa-miR-217
RBFOX2	hsa-miR-210-3p
RBM15B	hsa-miR-10b-5p
RBM20	hsa-miR-217
RBMS3	hsa-miR-10b-5p
RBMX	hsa-miR-136-5p
RBMXL1	hsa-miR-136-5p
RBPMS	hsa-miR-744-5p
RCN3	hsa-miR-744-5p
RCSD1	hsa-miR-10b-5p
RDH11	hsa-miR-96-5p
REEP2	hsa-miR-744-5p
RELL1	hsa-miR-183-5p
REM2	hsa-miR-187-3p
REXO1L1	hsa-miR-10b-5p
RFC2	hsa-miR-744-5p
RFT1	hsa-miR-10b-5p
RFX1	hsa-miR-744-5p
RGMA	hsa-miR-744-5p
RGPD1	hsa-miR-96-5p
RGPD6	hsa-miR-103a-3p
RGS1	hsa-miR-423-5p
RGS16	hsa-miR-744-5p
RGS2	hsa-miR-96-5p
RGS8	hsa-miR-10b-5p
RHBDF1	hsa-miR-187-3p
RHBDL3	hsa-miR-10b-5p
RHPN2	hsa-miR-96-5p
RILPL1	hsa-miR-217
RIMKLB	hsa-miR-187-3p
RIMS4	hsa-miR-423-5p
RIN3	hsa-miR-1306-3p
RIT1	hsa-miR-210-3p
RMDN1	hsa-miR-10b-5p
RNASEL	hsa-miR-103a-3p
RNF112	hsa-miR-10b-5p
RNF125	hsa-miR-10b-5p
RNF138	hsa-miR-142-5p
RNF141	hsa-miR-199a-3p
RNF169	hsa-miR-10b-5p
RNF186	hsa-miR-10b-5p
RNF2	hsa-miR-183-5p
RNF38	hsa-miR-423-5p
RNF7	hsa-miR-10b-5p
RNGTT	hsa-miR-187-3p
RNMT	hsa-miR-103a-3p
ROBO2	hsa-miR-183-5p
ROR2	hsa-miR-744-5p
RORA	hsa-miR-10b-5p
RPGRIP1L	hsa-miR-217
RPL10	hsa-miR-187-3p
RPL13A	hsa-miR-10b-5p
RPL28	hsa-miR-744-5p
RPL32	hsa-miR-103a-3p
RPL34	hsa-miR-216a-5p
RPP25	hsa-miR-187-3p
RPRD1A	hsa-miR-10b-5p
RPS29	hsa-miR-10b-5p
RPS6KA2	hsa-miR-10b-5p
RPS6KA3	hsa-miR-1306-3p
RPS6KA4	hsa-miR-423-5p
RPTOR	hsa-miR-744-5p
RRAGD	hsa-miR-216a-5p
RRAS	hsa-miR-1306-3p
RRP1B	hsa-miR-210-3p
RS1	hsa-miR-103a-3p
RSF1	hsa-miR-210-3p
RSPH10B2	hsa-miR-187-3p
RTF1	hsa-miR-217
RTP1	hsa-miR-423-5p
RUFY3	hsa-miR-10b-5p
RUNX1T1	hsa-miR-103a-3p
RUNX2	hsa-miR-217
RUNX3	hsa-miR-210-3p
RUSC2	hsa-miR-10b-5p
RYK	hsa-miR-96-5p
RYR2	hsa-miR-187-3p
S100A16	hsa-miR-744-5p
S100A4	hsa-miR-187-3p
S100A7A	hsa-miR-504-5p
SALL1	hsa-miR-744-5p
SAMD12	hsa-miR-199a-3p
SAMD9	hsa-miR-217
SAP18	hsa-miR-744-5p
SAR1B	hsa-miR-10b-5p
SBK1	hsa-miR-744-5p
SCARA3	hsa-miR-210-3p
SCARA5	hsa-miR-210-3p
SCARB2	hsa-miR-187-3p
SCD	hsa-miR-744-5p
SCD5	hsa-miR-10b-5p
SCN1A	hsa-miR-103a-3p
SCN1B	hsa-miR-744-5p
SCN2A	hsa-miR-103a-3p
SCN2B	hsa-miR-10b-5p
SCN5A	hsa-miR-10b-5p
SCN9A	hsa-miR-217
SCNN1G	hsa-miR-10b-5p
SCOC	hsa-miR-142-5p
SCRN1	hsa-miR-10b-5p
SCUBE3	hsa-miR-744-5p
SDC2	hsa-miR-199a-3p
SDE2	hsa-miR-216a-5p
SDF2	hsa-miR-210-3p
SDK2	hsa-miR-187-3p
SDPR	hsa-miR-10b-5p
SDR42E1	hsa-miR-10b-5p
SEC14L1	hsa-miR-10b-5p
SEC14L2	hsa-miR-10b-5p
SEC24B	hsa-miR-210-3p
SEC62	hsa-miR-10b-5p
SEL1L	hsa-miR-183-5p
SELT	hsa-miR-182-3p
SEMA3E	hsa-miR-199a-3p
SEMA5A	hsa-miR-296-3p
SEMA5B	hsa-miR-210-3p
SEMA6A	hsa-miR-210-3p
SENP5	hsa-miR-10b-5p
SERAC1	hsa-miR-504-5p
SERINC3	hsa-miR-10b-5p
SERP1	hsa-miR-504-5p
SERPINB2	hsa-miR-296-3p
SERPINE2	hsa-miR-199a-3p
SERPINF2	hsa-miR-744-5p
SERTAD2	hsa-miR-744-5p
SERTM1	hsa-miR-10b-5p
SESTD1	hsa-miR-10b-5p
SEZ6L	hsa-miR-96-5p
SFMBT2	hsa-miR-504-5p
SFRP4	hsa-miR-96-5p
SFRP5	hsa-miR-744-5p
SFT2D3	hsa-miR-217
SFTPB	hsa-miR-744-5p
SGCD	hsa-miR-142-5p
SGSM2	hsa-miR-744-5p
SGTB	hsa-miR-136-5p
SH2D5	hsa-miR-744-5p
SH3BGRL	hsa-miR-210-3p
SH3BP2	hsa-miR-10b-5p
SH3BP4	hsa-miR-103a-3p
SH3BP5	hsa-miR-296-3p
SH3GL1	hsa-miR-744-5p
SH3KBP1	hsa-miR-96-5p
SH3PXD2B	hsa-miR-96-5p
SHC4	hsa-miR-182-3p
SHISA2	hsa-miR-10b-5p
SHOX	hsa-miR-1306-3p
SHOX2	hsa-miR-744-5p
SHPRH	hsa-miR-182-3p
SIGLEC1	hsa-miR-744-5p
SIM1	hsa-miR-210-3p
SIM2	hsa-miR-10b-5p
SIN3A	hsa-miR-504-5p
SIN3B	hsa-miR-210-3p
SIPA1L3	hsa-miR-210-3p
SIRT1	hsa-miR-217
SKA1	hsa-miR-10b-5p
SKA3	hsa-miR-217
SLC11A2	hsa-miR-423-5p
SLC15A2	hsa-miR-217
SLC16A9	hsa-miR-96-5p
SLC17A9	hsa-miR-187-3p
SLC19A1	hsa-miR-744-5p
SLC1A2	hsa-miR-187-3p
SLC1A7	hsa-miR-744-5p
SLC22A15	hsa-miR-199a-3p
SLC24A4	hsa-miR-10b-5p
SLC25A1	hsa-miR-744-5p
SLC25A19	hsa-miR-1306-3p
SLC25A22	hsa-miR-744-5p
SLC25A24	hsa-miR-182-3p
SLC25A26	hsa-miR-210-3p
SLC25A53	hsa-miR-187-3p
SLC29A3	hsa-miR-744-5p
SLC30A7	hsa-miR-10b-5p
SLC30A8	hsa-miR-142-5p
SLC33A1	hsa-miR-199a-3p
SLC35A3	hsa-miR-136-5p
SLC35D1	hsa-miR-103a-3p
SLC35E2B	hsa-miR-1306-3p
SLC36A2	hsa-miR-187-3p
SLC38A2	hsa-miR-10b-5p
SLC38A4	hsa-miR-96-5p
SLC39A1	hsa-miR-96-5p
SLC45A4	hsa-miR-744-5p
SLC46A1	hsa-miR-216a-5p
SLC4A4	hsa-miR-210-3p
SLC52A3	hsa-miR-423-5p
SLC5A3	hsa-miR-10b-5p
SLC6A1	hsa-miR-210-3p
SLC6A19	hsa-miR-183-5p
SLC6A2	hsa-miR-187-3p
SLC6A3	hsa-miR-187-3p
SLC6A4	hsa-miR-182-3p
SLC6A6	hsa-miR-744-5p
SLC6A8	hsa-miR-744-5p
SLC7A1	hsa-miR-744-5p
SLC7A11	hsa-miR-10b-5p
SLC7A2	hsa-miR-10b-5p
SLC7A5	hsa-miR-1306-3p
SLC7A6	hsa-miR-10b-5p
SLC7A8	hsa-miR-182-3p
SLC8A3	hsa-miR-210-3p
SLC9A2	hsa-miR-199a-3p
SLC9A3R2	hsa-miR-744-5p
SLC9A5	hsa-miR-10b-5p
SLC9A6	hsa-miR-142-5p
SLC9A8	hsa-miR-10b-5p
SLC9B2	hsa-miR-182-3p
SLCO2A1	hsa-miR-1306-3p
SLCO4C1	hsa-miR-210-3p
SMAD2	hsa-miR-10b-5p
SMAD4	hsa-miR-210-3p
SMAD9	hsa-miR-217
SMARCA5	hsa-miR-10b-5p
SMARCC1	hsa-miR-10b-5p
SMC2	hsa-miR-1306-3p
SMG5	hsa-miR-210-3p
SMIM3	hsa-miR-103a-3p
SMPD1	hsa-miR-103a-3p
SMU1	hsa-miR-10b-5p
SNAPC1	hsa-miR-136-5p
SNCA	hsa-miR-142-5p
SNCB	hsa-miR-744-5p
SNTB2	hsa-miR-182-3p
SNX1	hsa-miR-10b-5p
SNX16	hsa-miR-199a-3p
SNX18	hsa-miR-10b-5p
SNX22	hsa-miR-504-5p
SNX27	hsa-miR-10b-5p
SNX8	hsa-miR-744-5p
SOCS4	hsa-miR-136-5p
SOCS6	hsa-miR-183-5p
SOD3	hsa-miR-744-5p
SOGA3	hsa-miR-217
SOHLH2	hsa-miR-187-3p
SON	hsa-miR-10b-5p
SORT1	hsa-miR-10b-5p
SOWAHC	hsa-miR-217
SOX1	hsa-miR-744-5p
SOX11	hsa-miR-187-3p
SOX12	hsa-miR-744-5p
SOX3	hsa-miR-744-5p
SOX5	hsa-miR-142-5p
SOX6	hsa-miR-96-5p
SP2	hsa-miR-744-5p
SP3	hsa-miR-187-3p
SPAG17	hsa-miR-96-5p
SPATA2	hsa-miR-423-5p
SPATS2L	hsa-miR-10b-5p
SPCS2	hsa-miR-136-5p
SPDYE3	hsa-miR-103a-3p
SPECC1	hsa-miR-136-5p
SPECC1L	hsa-miR-744-5p
SPIN4	hsa-miR-142-5p
SPIRE1	hsa-miR-10b-5p
SPN	hsa-miR-10b-5p
SPOCK1	hsa-miR-10b-5p
SPOCK2	hsa-miR-744-5p
SPON2	hsa-miR-744-5p
SPOPL	hsa-miR-142-5p
SPRED1	hsa-miR-199a-3p
SPRED2	hsa-miR-210-3p
SPRY3	hsa-miR-96-5p
SPRYD7	hsa-miR-142-5p
SPSB1	hsa-miR-10b-5p
SPTBN4	hsa-miR-744-5p
SPTLC3	hsa-miR-217
SRC	hsa-miR-744-5p
SRD5A1	hsa-miR-136-5p
SRGAP1	hsa-miR-744-5p
SRGN	hsa-miR-10b-5p
SRPK1	hsa-miR-182-3p
SRSF6	hsa-miR-142-5p
SRSF8	hsa-miR-187-3p
SSH1	hsa-miR-744-5p
SSR1	hsa-miR-10b-5p
SSX1	hsa-miR-210-3p
SSX2	hsa-miR-210-3p
SSX2B	hsa-miR-210-3p
SSX4	hsa-miR-210-3p
SSX4B	hsa-miR-210-3p
ST18	hsa-miR-217
ST3GAL2	hsa-miR-744-5p
ST8SIA3	hsa-miR-103a-3p
STAT3	hsa-miR-10b-5p
STAT6	hsa-miR-210-3p
STAU1	hsa-miR-187-3p
STC1	hsa-miR-183-5p
STEAP4	hsa-miR-10b-5p
STK10	hsa-miR-10b-5p
STK16	hsa-miR-10b-5p
STK17A	hsa-miR-96-5p
STK17B	hsa-miR-216a-5p
STK35	hsa-miR-744-5p
STK40	hsa-miR-423-5p
STMN1	hsa-miR-1306-3p
STRN3	hsa-miR-136-5p
STX18	hsa-miR-183-5p
STX3	hsa-miR-217
STX5	hsa-miR-10b-5p
STXBP3	hsa-miR-136-5p
SUMF2	hsa-miR-504-5p
SUN2	hsa-miR-10b-5p
SUPT7L	hsa-miR-210-3p
SURF4	hsa-miR-744-5p
SYK	hsa-miR-210-3p
SYNGR1	hsa-miR-744-5p
SYNJ1	hsa-miR-199a-3p
SYP	hsa-miR-10b-5p
SYT2	hsa-miR-187-3p
SZT2	hsa-miR-744-5p
T	hsa-miR-217
TAB1	hsa-miR-504-5p
TAB2	hsa-miR-199a-3p
TAB3	hsa-miR-183-5p
TAL1	hsa-miR-136-5p
TANC2	hsa-miR-187-3p
TAP2	hsa-miR-136-5p
TBC1D12	hsa-miR-103a-3p
TBC1D15	hsa-miR-216a-5p
TBC1D24	hsa-miR-744-5p
TBC1D25	hsa-miR-744-5p
TBC1D30	hsa-miR-217
TBL1X	hsa-miR-10b-5p
TBX1	hsa-miR-744-5p
TBX3	hsa-miR-187-3p
TBX5	hsa-miR-10b-5p
TCEB3	hsa-miR-744-5p
TCF20	hsa-miR-744-5p
TCF7	hsa-miR-744-5p
TCL1B	hsa-miR-423-5p
TDG	hsa-miR-103a-3p
TDO2	hsa-miR-217
TDRP	hsa-miR-210-3p
TEC	hsa-miR-423-5p
TECPR2	hsa-miR-210-3p
TEF	hsa-miR-423-5p
TENM1	hsa-miR-199a-3p
TEP1	hsa-miR-136-5p
TET1	hsa-miR-217
TET2	hsa-miR-210-3p
TFAP2C	hsa-miR-10b-5p
TFCP2L1	hsa-miR-504-5p
TFDP2	hsa-miR-210-3p
TFE3	hsa-miR-744-5p
TFPI	hsa-miR-10b-5p
TFRC	hsa-miR-10b-5p
TGFB1I1	hsa-miR-744-5p
TGFBR1	hsa-miR-1306-3p
TGFBR3	hsa-miR-103a-3p
TGIF2	hsa-miR-199a-3p
TGOLN2	hsa-miR-10b-5p
THAP2	hsa-miR-199a-3p
THBS2	hsa-miR-210-3p
THRB	hsa-miR-10b-5p
THSD4	hsa-miR-187-3p
TIAM1	hsa-miR-10b-5p
TK2	hsa-miR-10b-5p
TLE4	hsa-miR-103a-3p
TLK1	hsa-miR-217
TLN1	hsa-miR-744-5p
TLX1	hsa-miR-210-3p
TMC7	hsa-miR-103a-3p
TMCC1	hsa-miR-182-3p
TMED5	hsa-miR-199a-3p
TMEM105	hsa-miR-210-3p
TMEM106B	hsa-miR-216a-5p
TMEM109	hsa-miR-10b-5p
TMEM120B	hsa-miR-10b-5p
TMEM129	hsa-miR-183-5p
TMEM150A	hsa-miR-423-5p
TMEM164	hsa-miR-1306-3p
TMEM167B	hsa-miR-10b-5p
TMEM170B	hsa-miR-10b-5p
TMEM178A	hsa-miR-217
TMEM184B	hsa-miR-744-5p
TMEM187	hsa-miR-423-5p
TMEM189	hsa-miR-744-5p
TMEM19	hsa-miR-10b-5p
TMEM204	hsa-miR-210-3p
TMEM25	hsa-miR-423-5p
TMEM26	hsa-miR-182-3p
TMEM260	hsa-miR-136-5p
TMEM30A	hsa-miR-142-5p
TMEM40	hsa-miR-210-3p
TMEM41A	hsa-miR-423-5p
TMEM55A	hsa-miR-216a-5p
TMEM63C	hsa-miR-10b-5p
TMEM64	hsa-miR-217
TMEM87A	hsa-miR-199a-3p
TMEM97	hsa-miR-10b-5p
TMF1	hsa-miR-136-5p
TMOD1	hsa-miR-10b-5p
TMPO	hsa-miR-183-5p
TMSB4X	hsa-miR-183-5p
TMTC1	hsa-miR-10b-5p
TMTC4	hsa-miR-217
TMX3	hsa-miR-216a-5p
TNF	hsa-miR-187-3p
TNFAIP8L1	hsa-miR-216a-5p
TNFRSF10B	hsa-miR-10b-5p
TNFRSF1B	hsa-miR-744-5p
TNFSF11	hsa-miR-217
TNFSF8	hsa-miR-10b-5p
TNNI1	hsa-miR-10b-5p
TNPO1	hsa-miR-10b-5p
TNRC18	hsa-miR-136-5p
TNRC6B	hsa-miR-187-3p
TNS1	hsa-miR-210-3p
TOM1L2	hsa-miR-744-5p
TOMM20	hsa-miR-217
TOMM22	hsa-miR-136-5p
TOR1A	hsa-miR-210-3p
TOR1AIP2	hsa-miR-504-5p
TP53	hsa-miR-504-5p
TP73	hsa-miR-210-3p
TPCN1	hsa-miR-423-5p
TPD52	hsa-miR-136-5p
TPD52L2	hsa-miR-210-3p
TPD52L3	hsa-miR-183-5p
TPM3	hsa-miR-1306-3p
TPMT	hsa-miR-210-3p
TPP2	hsa-miR-10b-5p
TPPP	hsa-miR-187-3p
TRAF3IP2	hsa-miR-210-3p
TRANK1	hsa-miR-103a-3p
TRAPPC2	hsa-miR-10b-5p
TREML2	hsa-miR-210-3p
TRERF1	hsa-miR-136-5p
TRIM13	hsa-miR-96-5p
TRIM35	hsa-miR-103a-3p
TRIM36	hsa-miR-10b-5p
TRIM37	hsa-miR-187-3p
TRIM4	hsa-miR-199a-3p
TRIM54	hsa-miR-1306-3p
TRIOBP	hsa-miR-10b-5p
TRIP11	hsa-miR-103a-3p
TRIQK	hsa-miR-10b-5p
TRMT10A	hsa-miR-10b-5p
TRMT2B	hsa-miR-10b-5p
TRPC5	hsa-miR-296-3p
TRUB1	hsa-miR-142-5p
TSC1	hsa-miR-10b-5p
TSPAN10	hsa-miR-210-3p
TSPAN11	hsa-miR-1306-3p
TSPAN3	hsa-miR-187-3p
TSPAN31	hsa-miR-744-5p
TSPAN5	hsa-miR-187-3p
TSPAN9	hsa-miR-10b-5p
TTC24	hsa-miR-210-3p
TTC28	hsa-miR-217
TTC30A	hsa-miR-217
TTC39B	hsa-miR-217
TTC9	hsa-miR-210-3p
TTL	hsa-miR-187-3p
TTYH3	hsa-miR-744-5p
TUB	hsa-miR-10b-5p
TUBB1	hsa-miR-217
TUBB4A	hsa-miR-744-5p
TUBGCP3	hsa-miR-187-3p
TULP4	hsa-miR-10b-5p
TUSC5	hsa-miR-210-3p
TWSG1	hsa-miR-10b-5p
TXNDC16	hsa-miR-217
TYRO3	hsa-miR-423-5p
UBE2D3	hsa-miR-136-5p
UBE2G1	hsa-miR-96-5p
UBE2H	hsa-miR-10b-5p
UBE2L3	hsa-miR-1306-3p
UBE2W	hsa-miR-187-3p
UBE4A	hsa-miR-103a-3p
UBL3	hsa-miR-217
UBOX5	hsa-miR-10b-5p
UBR7	hsa-miR-10b-5p
UCHL1	hsa-miR-187-3p
UCP3	hsa-miR-136-5p
UHMK1	hsa-miR-103a-3p
UNC119B	hsa-miR-103a-3p
UNC45B	hsa-miR-504-5p
UNC5A	hsa-miR-744-5p
UNC5B	hsa-miR-744-5p
UPF1	hsa-miR-744-5p
UQCC1	hsa-miR-136-5p
URB2	hsa-miR-216a-5p
USH2A	hsa-miR-210-3p
USP13	hsa-miR-187-3p
USP15	hsa-miR-10b-5p
USP25	hsa-miR-199a-3p
USP40	hsa-miR-744-5p
USP42	hsa-miR-103a-3p
USP45	hsa-miR-296-3p
USP46	hsa-miR-10b-5p
USP53	hsa-miR-142-5p
USP6NL	hsa-miR-210-3p
UTP14C	hsa-miR-10b-5p
UVSSA	hsa-miR-10b-5p
VAC14	hsa-miR-210-3p
VAMP2	hsa-miR-744-5p
VAMP3	hsa-miR-199a-3p
VAMP4	hsa-miR-210-3p
VAPB	hsa-miR-103a-3p
VASH1	hsa-miR-10b-5p
VAT1	hsa-miR-96-5p
VAT1L	hsa-miR-96-5p
VCL	hsa-miR-103a-3p
VCPIP1	hsa-miR-216a-5p
VDR	hsa-miR-10b-5p
VGLL1	hsa-miR-187-3p
VGLL4	hsa-miR-744-5p
VLDLR	hsa-miR-199a-3p
VPS53	hsa-miR-10b-5p
VSIG4	hsa-miR-1306-3p
VSX2	hsa-miR-744-5p
VWA1	hsa-miR-744-5p
WAPAL	hsa-miR-199a-3p
WBSCR17	hsa-miR-744-5p
WDFY1	hsa-miR-183-5p
WDR26	hsa-miR-10b-5p
WDR3	hsa-miR-744-5p
WDR47	hsa-miR-199a-3p
WDR55	hsa-miR-10b-5p
WDR6	hsa-miR-210-3p
WDR72	hsa-miR-96-5p
WDR77	hsa-miR-217
WDR78	hsa-miR-10b-5p
WHSC1	hsa-miR-10b-5p
WNK3	hsa-miR-10b-5p
WNT3A	hsa-miR-423-5p
WNT5A	hsa-miR-744-5p
WNT7B	hsa-miR-1306-3p
WSCD1	hsa-miR-210-3p
WWC3	hsa-miR-217
WWP1	hsa-miR-103a-3p
WWP2	hsa-miR-744-5p
XIAP	hsa-miR-10b-5p
XKR9	hsa-miR-199a-3p
XKRY	hsa-miR-187-3p
XKRY2	hsa-miR-187-3p
XPNPEP3	hsa-miR-10b-5p
XPO4	hsa-miR-217
YAF2	hsa-miR-10b-5p
YARS2	hsa-miR-103a-3p
YES1	hsa-miR-199a-3p
YIPF6	hsa-miR-217
YME1L1	hsa-miR-1306-3p
YRDC	hsa-miR-103a-3p
YTHDC1	hsa-miR-103a-3p
YWHAE	hsa-miR-199a-3p
YWHAG	hsa-miR-217
YWHAH	hsa-miR-103a-3p
ZAK	hsa-miR-142-5p
ZBED1	hsa-miR-1306-3p
ZBTB10	hsa-miR-136-5p
ZBTB18	hsa-miR-199a-3p
ZBTB2	hsa-miR-216a-5p
ZBTB24	hsa-miR-10b-5p
ZBTB3	hsa-miR-10b-5p
ZBTB39	hsa-miR-103a-3p
ZBTB40	hsa-miR-504-5p
ZBTB43	hsa-miR-10b-5p
ZBTB46	hsa-miR-10b-5p
ZBTB9	hsa-miR-423-5p
ZC3H14	hsa-miR-199a-3p
ZC3H7B	hsa-miR-10b-5p
ZC3HAV1	hsa-miR-10b-5p
ZCCHC11	hsa-miR-96-5p
ZCCHC2	hsa-miR-103a-3p
ZDHHC15	hsa-miR-142-5p
ZDHHC9	hsa-miR-744-5p
ZFAND5	hsa-miR-183-5p
ZFP3	hsa-miR-744-5p
ZFP36L1	hsa-miR-96-5p
ZFP37	hsa-miR-136-5p
ZFPM2	hsa-miR-103a-3p
ZFX	hsa-miR-142-5p
ZFYVE20	hsa-miR-217
ZFYVE27	hsa-miR-10b-5p
ZHX1	hsa-miR-199a-3p
ZIC3	hsa-miR-136-5p
ZIC4	hsa-miR-744-5p
ZMAT3	hsa-miR-504-5p
ZMIZ1	hsa-miR-744-5p
ZMIZ2	hsa-miR-210-3p
ZMPSTE24	hsa-miR-217
ZMYM2	hsa-miR-103a-3p
ZMYM5	hsa-miR-1306-3p
ZMYND11	hsa-miR-10b-5p
ZNF135	hsa-miR-216a-5p
ZNF148	hsa-miR-136-5p
ZNF154	hsa-miR-10b-5p
ZNF202	hsa-miR-10b-5p
ZNF212	hsa-miR-744-5p
ZNF213	hsa-miR-744-5p
ZNF215	hsa-miR-10b-5p
ZNF23	hsa-miR-136-5p
ZNF28	hsa-miR-296-3p
ZNF326	hsa-miR-103a-3p
ZNF33A	hsa-miR-187-3p
ZNF385A	hsa-miR-744-5p
ZNF395	hsa-miR-187-3p
ZNF41	hsa-miR-187-3p
ZNF425	hsa-miR-10b-5p
ZNF43	hsa-miR-10b-5p
ZNF436	hsa-miR-136-5p
ZNF441	hsa-miR-199a-3p
ZNF445	hsa-miR-10b-5p
ZNF449	hsa-miR-210-3p
ZNF45	hsa-miR-217
ZNF48	hsa-miR-296-3p
ZNF483	hsa-miR-217
ZNF492	hsa-miR-10b-5p
ZNF502	hsa-miR-10b-5p
ZNF516	hsa-miR-187-3p
ZNF517	hsa-miR-10b-5p
ZNF555	hsa-miR-187-3p
ZNF557	hsa-miR-1306-3p
ZNF562	hsa-miR-10b-5p
ZNF577	hsa-miR-96-5p
ZNF587	hsa-miR-136-5p
ZNF606	hsa-miR-216a-5p
ZNF614	hsa-miR-216a-5p
ZNF623	hsa-miR-103a-3p
ZNF629	hsa-miR-744-5p
ZNF649	hsa-miR-216a-5p
ZNF662	hsa-miR-103a-3p
ZNF667	hsa-miR-96-5p
ZNF681	hsa-miR-217
ZNF704	hsa-miR-10b-5p
ZNF770	hsa-miR-183-5p
ZNF772	hsa-miR-142-5p
ZNF780A	hsa-miR-103a-3p
ZNF780B	hsa-miR-103a-3p
ZNF81	hsa-miR-10b-5p
ZNF84	hsa-miR-10b-5p
ZNF850	hsa-miR-10b-5p
ZNF92	hsa-miR-217
ZNHIT6	hsa-miR-199a-3p
ZNRF2	hsa-miR-103a-3p
ZNRF3	hsa-miR-10b-5p
ZRANB1	hsa-miR-103a-3p
ZSCAN22	hsa-miR-10b-5p
ZXDA	hsa-miR-136-5p
ZYG11B	hsa-miR-1306-3p

## Sheet: hpiPSCs
ABL2	hsa-miR-128-3p
ADCY2	hsa-miR-128-3p
AK4	hsa-miR-128-3p
AMD1	hsa-miR-128-3p
ATP6V1C1	hsa-miR-128-3p
BMI1	hsa-miR-128-3p
ZFP36L1	hsa-miR-128-3p
CDS1	hsa-miR-128-3p
CPD	hsa-miR-128-3p
MAPK14	hsa-miR-128-3p
CSF1	hsa-miR-128-3p
DCX	hsa-miR-128-3p
FBLN2	hsa-miR-128-3p
GCNT2	hsa-miR-128-3p
GLRX	hsa-miR-128-3p
GRIK3	hsa-miR-128-3p
GRIN2D	hsa-miR-128-3p
H3F3B	hsa-miR-128-3p
HTT	hsa-miR-128-3p
MR1	hsa-miR-128-3p
IRF4	hsa-miR-128-3p
ISL1	hsa-miR-128-3p
TNPO1	hsa-miR-128-3p
MNT	hsa-miR-128-3p
NAP1L2	hsa-miR-128-3p
NFX1	hsa-miR-128-3p
NGFR	hsa-miR-128-3p
OPHN1	hsa-miR-128-3p
ENPP1	hsa-miR-128-3p
PFKM	hsa-miR-128-3p
PIK3R1	hsa-miR-128-3p
PPP2R1B	hsa-miR-128-3p
PRKX	hsa-miR-128-3p
RET	hsa-miR-128-3p
SLA	hsa-miR-128-3p
SLC7A1	hsa-miR-128-3p
SLC7A2	hsa-miR-128-3p
SP1	hsa-miR-128-3p
TGFBR1	hsa-miR-128-3p
CCT3	hsa-miR-128-3p
TUB	hsa-miR-128-3p
VEGFC	hsa-miR-128-3p
WEE1	hsa-miR-128-3p
YWHAB	hsa-miR-128-3p
ATRN	hsa-miR-128-3p
ALDH4A1	hsa-miR-128-3p
CPNE3	hsa-miR-128-3p
SOCS6	hsa-miR-128-3p
ONECUT2	hsa-miR-128-3p
SOCS5	hsa-miR-128-3p
ARHGAP32	hsa-miR-128-3p
RNF144A	hsa-miR-128-3p
KBTBD11	hsa-miR-128-3p
YAF2	hsa-miR-128-3p
RCAN2	hsa-miR-128-3p
DCAF7	hsa-miR-128-3p
TXNIP	hsa-miR-128-3p
PDPN	hsa-miR-128-3p
PLK2	hsa-miR-128-3p
SEC24A	hsa-miR-128-3p
PDE10A	hsa-miR-128-3p
ADAMTS5	hsa-miR-128-3p
PTPRT	hsa-miR-128-3p
CASC3	hsa-miR-128-3p
COLGALT2	hsa-miR-128-3p
EFR3A	hsa-miR-128-3p
WDR7	hsa-miR-128-3p
ABCB9	hsa-miR-128-3p
DDAH1	hsa-miR-128-3p
SLC7A11	hsa-miR-128-3p
KIAA1549L	hsa-miR-128-3p
ATXN10	hsa-miR-128-3p
POU2F3	hsa-miR-128-3p
ARMC8	hsa-miR-128-3p
C2CD2	hsa-miR-128-3p
GIGYF2	hsa-miR-128-3p
DISC1	hsa-miR-128-3p
TMOD2	hsa-miR-128-3p
CLDN18	hsa-miR-128-3p
GLTP	hsa-miR-128-3p
PHF20	hsa-miR-128-3p
VSIG10	hsa-miR-128-3p
MSTO1	hsa-miR-128-3p
UBE2W	hsa-miR-128-3p
RCOR3	hsa-miR-128-3p
FGD6	hsa-miR-128-3p
SAR1A	hsa-miR-128-3p
DPYSL5	hsa-miR-128-3p
POGLUT1	hsa-miR-128-3p
PITHD1	hsa-miR-128-3p
GOPC	hsa-miR-128-3p
SH3RF1	hsa-miR-128-3p
KIAA1549	hsa-miR-128-3p
NEUROD6	hsa-miR-128-3p
CDCP1	hsa-miR-128-3p
ELOVL6	hsa-miR-128-3p
ZNF329	hsa-miR-128-3p
CEP76	hsa-miR-128-3p
NAA15	hsa-miR-128-3p
JHDM1D	hsa-miR-128-3p
SETD7	hsa-miR-128-3p
VANGL1	hsa-miR-128-3p
CABLES2	hsa-miR-128-3p
APH1B	hsa-miR-128-3p
THAP2	hsa-miR-128-3p
SH3BGRL2	hsa-miR-128-3p
PHF6	hsa-miR-128-3p
FAM126A	hsa-miR-128-3p
ZNF577	hsa-miR-128-3p
ARHGAP19	hsa-miR-128-3p
FAM105B	hsa-miR-128-3p
SLC39A13	hsa-miR-128-3p
ANKRD40	hsa-miR-128-3p
DMKN	hsa-miR-128-3p
ACTR8	hsa-miR-128-3p
ARHGAP12	hsa-miR-128-3p
C1QTNF7	hsa-miR-128-3p
NUS1	hsa-miR-128-3p
FAM129A	hsa-miR-128-3p
ASCL4	hsa-miR-128-3p
TCEANC2	hsa-miR-128-3p
STK35	hsa-miR-128-3p
SPTY2D1	hsa-miR-128-3p
C18orf25	hsa-miR-128-3p
DTX3L	hsa-miR-128-3p
RNF38	hsa-miR-128-3p
TMEM167A	hsa-miR-128-3p
DCP2	hsa-miR-128-3p
UBR1	hsa-miR-128-3p
SGMS1	hsa-miR-128-3p
DPY19L4	hsa-miR-128-3p
RBPMS2	hsa-miR-128-3p
ZNF470	hsa-miR-128-3p
BEND4	hsa-miR-128-3p
SAMD5	hsa-miR-128-3p
C11orf87	hsa-miR-128-3p
IFITM10	hsa-miR-128-3p
ANGPT2	hsa-miR-128-3p
CLCN6	hsa-miR-128-3p
FOXL1	hsa-miR-128-3p
HUS1	hsa-miR-128-3p
KCNJ10	hsa-miR-128-3p
CYP4F3	hsa-miR-128-3p
SMAD2	hsa-miR-128-3p
NKX3-1	hsa-miR-128-3p
PDK3	hsa-miR-128-3p
RAB3B	hsa-miR-128-3p
RBM4	hsa-miR-128-3p
CYP4F2	hsa-miR-128-3p
GPR55	hsa-miR-128-3p
ECE2	hsa-miR-128-3p
EBI3	hsa-miR-128-3p
SLU7	hsa-miR-128-3p
ZNF510	hsa-miR-128-3p
OLA1	hsa-miR-128-3p
SDK2	hsa-miR-128-3p
QPCTL	hsa-miR-128-3p
DHTKD1	hsa-miR-128-3p
CTPS2	hsa-miR-128-3p
SUSD1	hsa-miR-128-3p
ZNF557	hsa-miR-128-3p
FAM184A	hsa-miR-128-3p
MYCT1	hsa-miR-128-3p
DNAJC5	hsa-miR-128-3p
CTU1	hsa-miR-128-3p
ORMDL3	hsa-miR-128-3p
CYYR1	hsa-miR-128-3p
WDR36	hsa-miR-128-3p
SLFN13	hsa-miR-128-3p
LIX1	hsa-miR-128-3p
IBA57	hsa-miR-128-3p
ANKS6	hsa-miR-128-3p
LRRN4CL	hsa-miR-128-3p
SKA3	hsa-miR-128-3p
TWISTNB	hsa-miR-128-3p
PROSER2	hsa-miR-128-3p
S100A7A	hsa-miR-128-3p
C20orf202	hsa-miR-128-3p
H3F3C	hsa-miR-128-3p
CLYBL	hsa-miR-99a-5p
RAVER2	hsa-miR-99a-5p
FASLG	hsa-miR-219a-1-3p
COL11A1	hsa-miR-219a-1-3p
CX3CR1	hsa-miR-219a-1-3p
EIF4EBP2	hsa-miR-219a-1-3p
GUCY1A3	hsa-miR-219a-1-3p
IL6ST	hsa-miR-219a-1-3p
FOXK2	hsa-miR-219a-1-3p
KPNA3	hsa-miR-219a-1-3p
ENPP3	hsa-miR-219a-1-3p
SCD	hsa-miR-219a-1-3p
TEAD1	hsa-miR-219a-1-3p
NR4A3	hsa-miR-219a-1-3p
CD84	hsa-miR-219a-1-3p
EXOC5	hsa-miR-219a-1-3p
BVES	hsa-miR-219a-1-3p
MRAS	hsa-miR-219a-1-3p
ELL2	hsa-miR-219a-1-3p
CLIC4	hsa-miR-219a-1-3p
PTPN22	hsa-miR-219a-1-3p
METTL9	hsa-miR-219a-1-3p
RAB9B	hsa-miR-219a-1-3p
SRR	hsa-miR-219a-1-3p
WWC2	hsa-miR-219a-1-3p
KIAA1804	hsa-miR-219a-1-3p
MAK16	hsa-miR-219a-1-3p
MTDH	hsa-miR-219a-1-3p
PAQR3	hsa-miR-219a-1-3p
KIAA1324L	hsa-miR-219a-1-3p
HEPHL1	hsa-miR-219a-1-3p
BAG1	hsa-miR-219a-1-3p
CCND1	hsa-miR-219a-1-3p
GNAO1	hsa-miR-219a-1-3p
PTGER3	hsa-miR-219a-1-3p
RNF4	hsa-miR-219a-1-3p
SP100	hsa-miR-219a-1-3p
SYT1	hsa-miR-219a-1-3p
MPZL2	hsa-miR-219a-1-3p
ZWINT	hsa-miR-219a-1-3p
ATP2C1	hsa-miR-219a-1-3p
ZNF107	hsa-miR-219a-1-3p
SVOP	hsa-miR-219a-1-3p
KRBOX4	hsa-miR-219a-1-3p
CENPN	hsa-miR-219a-1-3p
PPM1H	hsa-miR-219a-1-3p
EPG5	hsa-miR-219a-1-3p
ANKRD55	hsa-miR-219a-1-3p
CEP44	hsa-miR-219a-1-3p
FCRL4	hsa-miR-219a-1-3p
GBP4	hsa-miR-219a-1-3p
TMEM99	hsa-miR-219a-1-3p
WBP2NL	hsa-miR-219a-1-3p
FAM71C	hsa-miR-219a-1-3p
ZNF493	hsa-miR-219a-1-3p
PAIP2B	hsa-miR-219a-1-3p
ACOX1	hsa-miR-92b-3p
ACTC1	hsa-miR-92b-3p
AXL	hsa-miR-92b-3p
CCNC	hsa-miR-92b-3p
CD69	hsa-miR-92b-3p
CHKA	hsa-miR-92b-3p
CXADR	hsa-miR-92b-3p
DSC2	hsa-miR-92b-3p
FHL2	hsa-miR-92b-3p
FMR1	hsa-miR-92b-3p
GATA2	hsa-miR-92b-3p
GOLGA3	hsa-miR-92b-3p
ITGA5	hsa-miR-92b-3p
LAMP2	hsa-miR-92b-3p
MAN2A1	hsa-miR-92b-3p
ATXN3	hsa-miR-92b-3p
MYO1B	hsa-miR-92b-3p
MYO5A	hsa-miR-92b-3p
NEFH	hsa-miR-92b-3p
NFIA	hsa-miR-92b-3p
SLC11A2	hsa-miR-92b-3p
PAFAH1B1	hsa-miR-92b-3p
PLD1	hsa-miR-92b-3p
PTPRO	hsa-miR-92b-3p
RAD21	hsa-miR-92b-3p
RAG1	hsa-miR-92b-3p
RGS3	hsa-miR-92b-3p
ROBO2	hsa-miR-92b-3p
RORA	hsa-miR-92b-3p
SHOX	hsa-miR-92b-3p
SOX4	hsa-miR-92b-3p
SSFA2	hsa-miR-92b-3p
HNF1B	hsa-miR-92b-3p
DYNLT3	hsa-miR-92b-3p
TEF	hsa-miR-92b-3p
TMF1	hsa-miR-92b-3p
EVI5	hsa-miR-92b-3p
BTG2	hsa-miR-92b-3p
CACNA1I	hsa-miR-92b-3p
KLF4	hsa-miR-92b-3p
EDEM1	hsa-miR-92b-3p
HIPK3	hsa-miR-92b-3p
LHFPL2	hsa-miR-92b-3p
INADL	hsa-miR-92b-3p
PDS5B	hsa-miR-92b-3p
OTUD3	hsa-miR-92b-3p
SGK3	hsa-miR-92b-3p
DSTYK	hsa-miR-92b-3p
NECAP1	hsa-miR-92b-3p
PCDH11X	hsa-miR-92b-3p
STRN3	hsa-miR-92b-3p
NOX4	hsa-miR-92b-3p
RNF141	hsa-miR-92b-3p
RAB23	hsa-miR-92b-3p
C21orf91	hsa-miR-92b-3p
SLC38A2	hsa-miR-92b-3p
RBM47	hsa-miR-92b-3p
RSBN1	hsa-miR-92b-3p
DNAJB12	hsa-miR-92b-3p
TMEM255A	hsa-miR-92b-3p
LGI2	hsa-miR-92b-3p
SLC17A6	hsa-miR-92b-3p
SLC4A10	hsa-miR-92b-3p
SLC12A5	hsa-miR-92b-3p
42433	hsa-miR-92b-3p
XPNPEP3	hsa-miR-92b-3p
MOAP1	hsa-miR-92b-3p
PAPD5	hsa-miR-92b-3p
C5orf28	hsa-miR-92b-3p
SUDS3	hsa-miR-92b-3p
FNDC3B	hsa-miR-92b-3p
BCL11B	hsa-miR-92b-3p
MTMR9	hsa-miR-92b-3p
CCNJL	hsa-miR-92b-3p
PCDH11Y	hsa-miR-92b-3p
SLX4	hsa-miR-92b-3p
USP45	hsa-miR-92b-3p
FNIP1	hsa-miR-92b-3p
PCMTD1	hsa-miR-92b-3p
TAGAP	hsa-miR-92b-3p
TRIM6	hsa-miR-92b-3p
SLC30A7	hsa-miR-92b-3p
NKX2-3	hsa-miR-92b-3p
CCDC89	hsa-miR-92b-3p
MSRB3	hsa-miR-92b-3p
MCOLN2	hsa-miR-92b-3p
CNEP1R1	hsa-miR-92b-3p
STEAP2	hsa-miR-92b-3p
SPRYD4	hsa-miR-92b-3p
FREM2	hsa-miR-92b-3p
SLC6A17	hsa-miR-92b-3p
LIN28B	hsa-miR-92b-3p
FAM19A1	hsa-miR-92b-3p
OSGIN2	hsa-miR-92b-3p
FBN1	hsa-miR-92b-3p
GLRA1	hsa-miR-92b-3p
IFIT2	hsa-miR-92b-3p
NSF	hsa-miR-92b-3p
SRPR	hsa-miR-92b-3p
PRSS12	hsa-miR-92b-3p
TMSB4Y	hsa-miR-92b-3p
TPPP	hsa-miR-92b-3p
KCTD2	hsa-miR-92b-3p
METTL7A	hsa-miR-92b-3p
APPL1	hsa-miR-92b-3p
PCOLCE2	hsa-miR-92b-3p
BCL11A	hsa-miR-92b-3p
ZNF586	hsa-miR-92b-3p
DUS2	hsa-miR-92b-3p
WIPI1	hsa-miR-92b-3p
PCDHB11	hsa-miR-92b-3p
ZFAND1	hsa-miR-92b-3p
COG3	hsa-miR-92b-3p
PKDCC	hsa-miR-92b-3p
COX20	hsa-miR-92b-3p
TMC8	hsa-miR-92b-3p
GPR111	hsa-miR-92b-3p
C9orf47	hsa-miR-92b-3p
BCAT1	hsa-miR-218-5p
CEACAM1	hsa-miR-218-5p
KLF9	hsa-miR-218-5p
CACNB4	hsa-miR-218-5p
RCC1	hsa-miR-218-5p
HAPLN1	hsa-miR-218-5p
EDA	hsa-miR-218-5p
MEGF9	hsa-miR-218-5p
ELK4	hsa-miR-218-5p
GFPT1	hsa-miR-218-5p
TNC	hsa-miR-218-5p
INHBB	hsa-miR-218-5p
KPNA4	hsa-miR-218-5p
LASP1	hsa-miR-218-5p
MAFG	hsa-miR-218-5p
MID1	hsa-miR-218-5p
NRAS	hsa-miR-218-5p
PCDH8	hsa-miR-218-5p
PDGFRA	hsa-miR-218-5p
PLEK	hsa-miR-218-5p
POU2F1	hsa-miR-218-5p
PRLR	hsa-miR-218-5p
PSMC2	hsa-miR-218-5p
ABCD4	hsa-miR-218-5p
RAB6A	hsa-miR-218-5p
PRPH2	hsa-miR-218-5p
SCN2B	hsa-miR-218-5p
SGCD	hsa-miR-218-5p
SLC1A2	hsa-miR-218-5p
SNTB2	hsa-miR-218-5p
STXBP1	hsa-miR-218-5p
TMPO	hsa-miR-218-5p
TPD52	hsa-miR-218-5p
VRK2	hsa-miR-218-5p
ZNF37A	hsa-miR-218-5p
CCDC6	hsa-miR-218-5p
SKAP1	hsa-miR-218-5p
SNX4	hsa-miR-218-5p
RABEP1	hsa-miR-218-5p
CHST3	hsa-miR-218-5p
RHOBTB1	hsa-miR-218-5p
SV2B	hsa-miR-218-5p
CALCRL	hsa-miR-218-5p
IKZF1	hsa-miR-218-5p
RBBP9	hsa-miR-218-5p
SHANK2	hsa-miR-218-5p
KIF21B	hsa-miR-218-5p
FAM175B	hsa-miR-218-5p
DIP2A	hsa-miR-218-5p
PUM2	hsa-miR-218-5p
RIMBP2	hsa-miR-218-5p
SERP1	hsa-miR-218-5p
GOLGA7	hsa-miR-218-5p
FAM198B	hsa-miR-218-5p
PEX5L	hsa-miR-218-5p
ARID4B	hsa-miR-218-5p
IMPAD1	hsa-miR-218-5p
COMMD8	hsa-miR-218-5p
MSL2	hsa-miR-218-5p
OTUD7B	hsa-miR-218-5p
CDC42SE2	hsa-miR-218-5p
KIAA1598	hsa-miR-218-5p
MRPS14	hsa-miR-218-5p
OTUB2	hsa-miR-218-5p
RNF219	hsa-miR-218-5p
PLEKHF2	hsa-miR-218-5p
C1orf21	hsa-miR-218-5p
CALN1	hsa-miR-218-5p
PARD6B	hsa-miR-218-5p
TMEM25	hsa-miR-218-5p
GTPBP10	hsa-miR-218-5p
SORCS1	hsa-miR-218-5p
KLHL29	hsa-miR-218-5p
FBXO32	hsa-miR-218-5p
AGAP1	hsa-miR-218-5p
HECTD2	hsa-miR-218-5p
CPNE8	hsa-miR-218-5p
FAM109A	hsa-miR-218-5p
FAM84A	hsa-miR-218-5p
CCDC50	hsa-miR-218-5p
MIER3	hsa-miR-218-5p
C10orf25	hsa-miR-218-5p
MDGA1	hsa-miR-218-5p
C3orf70	hsa-miR-218-5p
TUSC5	hsa-miR-218-5p
MACC1	hsa-miR-218-5p
MAST4	hsa-miR-218-5p
SHC4	hsa-miR-218-5p
SAMD12	hsa-miR-218-5p
PIN4	hsa-miR-218-5p
PKHD1	hsa-miR-218-5p
TNFAIP1	hsa-miR-218-5p
RNF103	hsa-miR-218-5p
MALT1	hsa-miR-218-5p
SYNE1	hsa-miR-218-5p
EMR2	hsa-miR-218-5p
WDR5B	hsa-miR-218-5p
C1orf27	hsa-miR-218-5p
SYT13	hsa-miR-218-5p
PLEKHA2	hsa-miR-218-5p
LRRC19	hsa-miR-218-5p
DCAF10	hsa-miR-218-5p
RIC3	hsa-miR-218-5p
THAP9	hsa-miR-218-5p
EGLN3	hsa-miR-218-5p
AFMID	hsa-miR-218-5p
GADL1	hsa-miR-218-5p
SOWAHB	hsa-miR-218-5p
CEP85L	hsa-miR-218-5p
C6orf201	hsa-miR-218-5p
C18orf63	hsa-miR-218-5p
BCL2L2	hsa-miR-497-5p
BDNF	hsa-miR-497-5p
RUNX1T1	hsa-miR-497-5p
CLCN5	hsa-miR-497-5p
COL12A1	hsa-miR-497-5p
DMPK	hsa-miR-497-5p
DYNC1I1	hsa-miR-497-5p
DTNA	hsa-miR-497-5p
DVL3	hsa-miR-497-5p
ESRRG	hsa-miR-497-5p
FGFR1	hsa-miR-497-5p
FUT3	hsa-miR-497-5p
B4GALT1	hsa-miR-497-5p
UBE2K	hsa-miR-497-5p
IFNAR1	hsa-miR-497-5p
INSR	hsa-miR-497-5p
IRF1	hsa-miR-497-5p
KIF5C	hsa-miR-497-5p
LRP2	hsa-miR-497-5p
MEOX2	hsa-miR-497-5p
MN1	hsa-miR-497-5p
MOCS1	hsa-miR-497-5p
MYB	hsa-miR-497-5p
MYLK	hsa-miR-497-5p
42615	hsa-miR-497-5p
NOS1	hsa-miR-497-5p
PAFAH1B2	hsa-miR-497-5p
PAPPA	hsa-miR-497-5p
PBX3	hsa-miR-497-5p
PCDH9	hsa-miR-497-5p
CDK17	hsa-miR-497-5p
PLAG1	hsa-miR-497-5p
UBL3	hsa-miR-497-5p
PPARA	hsa-miR-497-5p
PPP6C	hsa-miR-497-5p
PRKAB2	hsa-miR-497-5p
MASP1	hsa-miR-497-5p
PTCH1	hsa-miR-497-5p
PTH	hsa-miR-497-5p
PTPN3	hsa-miR-497-5p
PTPN4	hsa-miR-497-5p
PTPRR	hsa-miR-497-5p
PVRL1	hsa-miR-497-5p
RAD23B	hsa-miR-497-5p
SGK1	hsa-miR-497-5p
SIAH1	hsa-miR-497-5p
SKI	hsa-miR-497-5p
SLC5A3	hsa-miR-497-5p
SLC12A2	hsa-miR-497-5p
SLC13A1	hsa-miR-497-5p
SMPD1	hsa-miR-497-5p
SSR1	hsa-miR-497-5p
STXBP3	hsa-miR-497-5p
SYPL1	hsa-miR-497-5p
TAF5	hsa-miR-497-5p
TGFBR3	hsa-miR-497-5p
YWHAH	hsa-miR-497-5p
ZIC1	hsa-miR-497-5p
ZMYM2	hsa-miR-497-5p
CSDE1	hsa-miR-497-5p
SHOC2	hsa-miR-497-5p
ELL	hsa-miR-497-5p
DGCR14	hsa-miR-497-5p
FZD4	hsa-miR-497-5p
CUL2	hsa-miR-497-5p
MKNK1	hsa-miR-497-5p
CDC23	hsa-miR-497-5p
CD164	hsa-miR-497-5p
APLN	hsa-miR-497-5p
EIF2B2	hsa-miR-497-5p
MTMR3	hsa-miR-497-5p
BSN	hsa-miR-497-5p
MAP7	hsa-miR-497-5p
NFS1	hsa-miR-497-5p
CLDN2	hsa-miR-497-5p
VAPB	hsa-miR-497-5p
COPS2	hsa-miR-497-5p
UBE4A	hsa-miR-497-5p
GCC2	hsa-miR-497-5p
DEPDC5	hsa-miR-497-5p
N4BP1	hsa-miR-497-5p
KIAA0247	hsa-miR-497-5p
TLK1	hsa-miR-497-5p
ZBTB39	hsa-miR-497-5p
TECPR2	hsa-miR-497-5p
USP15	hsa-miR-497-5p
PDCD6IP	hsa-miR-497-5p
COL4A3BP	hsa-miR-497-5p
TSPAN5	hsa-miR-497-5p
RBM12	hsa-miR-497-5p
SPRY3	hsa-miR-497-5p
SLC9A6	hsa-miR-497-5p
VAT1	hsa-miR-497-5p
NEBL	hsa-miR-497-5p
ABHD2	hsa-miR-497-5p
CLASRP	hsa-miR-497-5p
RNF24	hsa-miR-497-5p
MGAT4A	hsa-miR-497-5p
ATG14	hsa-miR-497-5p
SACM1L	hsa-miR-497-5p
ATF6	hsa-miR-497-5p
STK38L	hsa-miR-497-5p
XPO7	hsa-miR-497-5p
ZNF609	hsa-miR-497-5p
WAPAL	hsa-miR-497-5p
GGA3	hsa-miR-497-5p
WWC1	hsa-miR-497-5p
AHCYL2	hsa-miR-497-5p
DICER1	hsa-miR-497-5p
NCS1	hsa-miR-497-5p
SUZ12	hsa-miR-497-5p
CD2AP	hsa-miR-497-5p
BACE1	hsa-miR-497-5p
PLA2G15	hsa-miR-497-5p
CCDC28A	hsa-miR-497-5p
KBTBD2	hsa-miR-497-5p
GORASP2	hsa-miR-497-5p
PHF19	hsa-miR-497-5p
NSG1	hsa-miR-497-5p
DESI1	hsa-miR-497-5p
DLL1	hsa-miR-497-5p
HIPK2	hsa-miR-497-5p
TFCP2L1	hsa-miR-497-5p
NRBP1	hsa-miR-497-5p
TVP23B	hsa-miR-497-5p
RAPGEFL1	hsa-miR-497-5p
DNAJC27	hsa-miR-497-5p
ASB1	hsa-miR-497-5p
EMCN	hsa-miR-497-5p
GALNT7	hsa-miR-497-5p
ANKIB1	hsa-miR-497-5p
FAM63B	hsa-miR-497-5p
C17orf59	hsa-miR-497-5p
ZCCHC2	hsa-miR-497-5p
PID1	hsa-miR-497-5p
PTCD3	hsa-miR-497-5p
TASP1	hsa-miR-497-5p
ASH1L	hsa-miR-497-5p
MTFR1L	hsa-miR-497-5p
CYP26B1	hsa-miR-497-5p
DOLPP1	hsa-miR-497-5p
GATAD2B	hsa-miR-497-5p
SHROOM4	hsa-miR-497-5p
TAOK1	hsa-miR-497-5p
KIAA1462	hsa-miR-497-5p
SHROOM3	hsa-miR-497-5p
TMEM8A	hsa-miR-497-5p
TGIF2	hsa-miR-497-5p
C10orf54	hsa-miR-497-5p
ZFYVE20	hsa-miR-497-5p
ZMAT3	hsa-miR-497-5p
CSMD1	hsa-miR-497-5p
TMEM237	hsa-miR-497-5p
SOWAHC	hsa-miR-497-5p
WNK3	hsa-miR-497-5p
FAM134A	hsa-miR-497-5p
TMEM43	hsa-miR-497-5p
YRDC	hsa-miR-497-5p
SLC25A22	hsa-miR-497-5p
CPSF7	hsa-miR-497-5p
NUAK2	hsa-miR-497-5p
TFAP2D	hsa-miR-497-5p
ZDHHC16	hsa-miR-497-5p
SRRM4	hsa-miR-497-5p
CBX2	hsa-miR-497-5p
UNC119B	hsa-miR-497-5p
SPRYD3	hsa-miR-497-5p
WNT3A	hsa-miR-497-5p
FCHSD1	hsa-miR-497-5p
KLC4	hsa-miR-497-5p
TMEM55B	hsa-miR-497-5p
ELMSAN1	hsa-miR-497-5p
RFT1	hsa-miR-497-5p
SPSB4	hsa-miR-497-5p
SNX18	hsa-miR-497-5p
SLITRK1	hsa-miR-497-5p
IP6K3	hsa-miR-497-5p
E2F7	hsa-miR-497-5p
CMTM4	hsa-miR-497-5p
SIK1	hsa-miR-497-5p
TTC14	hsa-miR-497-5p
SNRNP48	hsa-miR-497-5p
FAM91A1	hsa-miR-497-5p
AGO4	hsa-miR-497-5p
SLC36A1	hsa-miR-497-5p
CYB561A3	hsa-miR-497-5p
ZBTB9	hsa-miR-497-5p
FOXK1	hsa-miR-497-5p
CNOT6L	hsa-miR-497-5p
COL24A1	hsa-miR-497-5p
PRTG	hsa-miR-497-5p
NWD1	hsa-miR-497-5p
SLC25A42	hsa-miR-497-5p
CYB561D1	hsa-miR-497-5p
NAT8L	hsa-miR-497-5p
TMEM189-UBE2V1	hsa-miR-497-5p
SLC25A35	hsa-miR-497-5p
FAM174B	hsa-miR-497-5p
SLC25A53	hsa-miR-497-5p
PPAPDC2	hsa-miR-497-5p
RGPD6	hsa-miR-497-5p
ABCF1	hsa-miR-497-5p
CD80	hsa-miR-497-5p
ENTPD1	hsa-miR-497-5p
CD40	hsa-miR-497-5p
ERCC6	hsa-miR-497-5p
GFAP	hsa-miR-497-5p
GLUD2	hsa-miR-497-5p
KCNK1	hsa-miR-497-5p
MAN2A2	hsa-miR-497-5p
MYO5B	hsa-miR-497-5p
PLS1	hsa-miR-497-5p
PPP1R2	hsa-miR-497-5p
TMPRSS15	hsa-miR-497-5p
SGCA	hsa-miR-497-5p
SH3BP2	hsa-miR-497-5p
SLC16A1	hsa-miR-497-5p
SNRPB2	hsa-miR-497-5p
STX1A	hsa-miR-497-5p
UBE2V1	hsa-miR-497-5p
VCL	hsa-miR-497-5p
XDH	hsa-miR-497-5p
HMGA2	hsa-miR-497-5p
CDC14B	hsa-miR-497-5p
PPAP2A	hsa-miR-497-5p
QKI	hsa-miR-497-5p
IP6K1	hsa-miR-497-5p
POLD3	hsa-miR-497-5p
GADD45G	hsa-miR-497-5p
DNAJC16	hsa-miR-497-5p
KIAA0895	hsa-miR-497-5p
ATP1B4	hsa-miR-497-5p
BLOC1S6	hsa-miR-497-5p
SSU72	hsa-miR-497-5p
MRPS2	hsa-miR-497-5p
ABI3	hsa-miR-497-5p
PLEKHA5	hsa-miR-497-5p
ETNK1	hsa-miR-497-5p
FERMT1	hsa-miR-497-5p
TBC1D24	hsa-miR-497-5p
ODF2L	hsa-miR-497-5p
SCOC	hsa-miR-497-5p
IPPK	hsa-miR-497-5p
FCRL2	hsa-miR-497-5p
LRRC27	hsa-miR-497-5p
KRTAP9-2	hsa-miR-497-5p
KRTAP9-3	hsa-miR-497-5p
KRTAP9-8	hsa-miR-497-5p
SFT2D3	hsa-miR-497-5p
KRTAP9-4	hsa-miR-497-5p
MCFD2	hsa-miR-497-5p
RAB3IP	hsa-miR-497-5p
MIPOL1	hsa-miR-497-5p
FAM134C	hsa-miR-497-5p
ZNF780B	hsa-miR-497-5p
RSPO1	hsa-miR-497-5p
TRIM59	hsa-miR-497-5p
C17orf51	hsa-miR-497-5p
SOGA3	hsa-miR-497-5p
C8orf86	hsa-miR-497-5p
ARL13A	hsa-miR-497-5p
SPDYE3	hsa-miR-497-5p
ABCA1	hsa-miR-195-3p
APBB2	hsa-miR-195-3p
AR	hsa-miR-195-3p
ATF3	hsa-miR-195-3p
BMP3	hsa-miR-195-3p
KLF5	hsa-miR-195-3p
RUNX1	hsa-miR-195-3p
CDK6	hsa-miR-195-3p
FOXO3	hsa-miR-195-3p
AFF2	hsa-miR-195-3p
GABRA4	hsa-miR-195-3p
GPM6B	hsa-miR-195-3p
GRSF1	hsa-miR-195-3p
HDAC2	hsa-miR-195-3p
RBPJ	hsa-miR-195-3p
INPP1	hsa-miR-195-3p
ITGA2	hsa-miR-195-3p
KIT	hsa-miR-195-3p
MDM4	hsa-miR-195-3p
PAX6	hsa-miR-195-3p
PPP1CB	hsa-miR-195-3p
PRKG1	hsa-miR-195-3p
RAB1A	hsa-miR-195-3p
RAB2A	hsa-miR-195-3p
RAB27B	hsa-miR-195-3p
RGS4	hsa-miR-195-3p
ATXN7	hsa-miR-195-3p
SCN2A	hsa-miR-195-3p
SOAT1	hsa-miR-195-3p
SP3	hsa-miR-195-3p
UBE2B	hsa-miR-195-3p
ZFP37	hsa-miR-195-3p
ZNF146	hsa-miR-195-3p
ZNF236	hsa-miR-195-3p
KAT6A	hsa-miR-195-3p
PDE5A	hsa-miR-195-3p
SEMA5A	hsa-miR-195-3p
ATG12	hsa-miR-195-3p
KL	hsa-miR-195-3p
BAG4	hsa-miR-195-3p
CREB5	hsa-miR-195-3p
HS2ST1	hsa-miR-195-3p
LRPPRC	hsa-miR-195-3p
IGF2BP2	hsa-miR-195-3p
BTG3	hsa-miR-195-3p
AKAP11	hsa-miR-195-3p
FBXO28	hsa-miR-195-3p
PHLPP1	hsa-miR-195-3p
ANKRD12	hsa-miR-195-3p
TBC1D30	hsa-miR-195-3p
TTC9	hsa-miR-195-3p
STX12	hsa-miR-195-3p
SERBP1	hsa-miR-195-3p
TAF5L	hsa-miR-195-3p
ATAD2	hsa-miR-195-3p
RAB6B	hsa-miR-195-3p
CMPK1	hsa-miR-195-3p
CNTN5	hsa-miR-195-3p
C9orf40	hsa-miR-195-3p
PRDM10	hsa-miR-195-3p
CAMK1D	hsa-miR-195-3p
INTS2	hsa-miR-195-3p
ARRDC3	hsa-miR-195-3p
DPP10	hsa-miR-195-3p
NFKBIZ	hsa-miR-195-3p
RNF128	hsa-miR-195-3p
TMEM87B	hsa-miR-195-3p
YTHDC1	hsa-miR-195-3p
TMEM182	hsa-miR-195-3p
SLITRK4	hsa-miR-195-3p
SOGA1	hsa-miR-195-3p
RC3H1	hsa-miR-195-3p
KANSL1L	hsa-miR-195-3p
IGSF11	hsa-miR-195-3p
SLC5A12	hsa-miR-195-3p
DENND1B	hsa-miR-195-3p
LCA5	hsa-miR-195-3p
RBM20	hsa-miR-195-3p
KIAA2022	hsa-miR-195-3p
CDKL4	hsa-miR-195-3p
IYD	hsa-miR-195-3p
GIMAP6	hsa-miR-195-3p
TMEM170B	hsa-miR-195-3p
CHML	hsa-miR-195-3p
CYBB	hsa-miR-195-3p
GABRG1	hsa-miR-195-3p
MSH2	hsa-miR-195-3p
CNOT4	hsa-miR-195-3p
PGR	hsa-miR-195-3p
TFAP2A	hsa-miR-195-3p
TIMP2	hsa-miR-195-3p
WARS	hsa-miR-195-3p
FAM115A	hsa-miR-195-3p
P2RY14	hsa-miR-195-3p
PRSS16	hsa-miR-195-3p
GPR83	hsa-miR-195-3p
GIN1	hsa-miR-195-3p
TMEM260	hsa-miR-195-3p
C22orf29	hsa-miR-195-3p
SGPP1	hsa-miR-195-3p
ZNF566	hsa-miR-195-3p
TRMT10A	hsa-miR-195-3p
TM4SF18	hsa-miR-195-3p
TARSL2	hsa-miR-195-3p
TTC39C	hsa-miR-195-3p
CCSAP	hsa-miR-195-3p
MAGEB16	hsa-miR-195-3p
ZNF681	hsa-miR-195-3p
EXOC8	hsa-miR-195-3p
RDH10	hsa-miR-195-3p
AWAT2	hsa-miR-195-3p
MURC	hsa-miR-195-3p
AMIGO2	hsa-miR-195-3p
CAPZA2	hsa-miR-195-5p
CCNE1	hsa-miR-195-5p
CHEK1	hsa-miR-195-5p
CLCN4	hsa-miR-195-5p
EYA1	hsa-miR-195-5p
EZH1	hsa-miR-195-5p
KDSR	hsa-miR-195-5p
GHR	hsa-miR-195-5p
GNA12	hsa-miR-195-5p
IHH	hsa-miR-195-5p
LRP6	hsa-miR-195-5p
CAPRIN1	hsa-miR-195-5p
PCMT1	hsa-miR-195-5p
PLXNA2	hsa-miR-195-5p
SALL1	hsa-miR-195-5p
PPP1R11	hsa-miR-195-5p
SMARCA5	hsa-miR-195-5p
BTRC	hsa-miR-195-5p
CLDN12	hsa-miR-195-5p
MED26	hsa-miR-195-5p
RAB10	hsa-miR-195-5p
PRDM4	hsa-miR-195-5p
SWAP70	hsa-miR-195-5p
TRIM35	hsa-miR-195-5p
FSTL4	hsa-miR-195-5p
GABARAPL1	hsa-miR-195-5p
NSMF	hsa-miR-195-5p
LAMP3	hsa-miR-195-5p
SESN1	hsa-miR-195-5p
USP25	hsa-miR-195-5p
PSAT1	hsa-miR-195-5p
ST8SIA3	hsa-miR-195-5p
ZNHIT6	hsa-miR-195-5p
TMEM100	hsa-miR-195-5p
FBXW7	hsa-miR-195-5p
RFK	hsa-miR-195-5p
KIF21A	hsa-miR-195-5p
SMURF1	hsa-miR-195-5p
USP31	hsa-miR-195-5p
GAREM	hsa-miR-195-5p
ZFHX4	hsa-miR-195-5p
UHMK1	hsa-miR-195-5p
CPEB2	hsa-miR-195-5p
C5orf47	hsa-miR-195-5p
CACUL1	hsa-miR-195-5p
BTLA	hsa-miR-195-5p
CC2D1B	hsa-miR-195-5p
DENND6A	hsa-miR-195-5p
ZDHHC22	hsa-miR-195-5p
HOXA10	hsa-miR-195-5p
CEACAM6	hsa-miR-195-5p
PHKA1	hsa-miR-195-5p
BCAS1	hsa-miR-195-5p
MYRIP	hsa-miR-195-5p
TMEM55A	hsa-miR-195-5p
HAUS3	hsa-miR-195-5p
IFT74	hsa-miR-195-5p
DIXDC1	hsa-miR-195-5p
EFCAB5	hsa-miR-195-5p
C12orf76	hsa-miR-195-5p
CRTC1	hsa-miR-92b-5p
FN3K	hsa-miR-92b-5p
SLC7A5	hsa-miR-92b-5p
FZD1	hsa-miR-92b-5p
IQSEC3	hsa-miR-92b-5p
XYLT1	hsa-miR-92b-5p
AGTR2	hsa-miR-20b-5p
ASAH1	hsa-miR-20b-5p
ATP1A2	hsa-miR-20b-5p
BCL2	hsa-miR-20b-5p
BMPR2	hsa-miR-20b-5p
FOXL2	hsa-miR-20b-5p
CASP8	hsa-miR-20b-5p
CCNG2	hsa-miR-20b-5p
CDKN1A	hsa-miR-20b-5p
CFL2	hsa-miR-20b-5p
CRK	hsa-miR-20b-5p
CTSK	hsa-miR-20b-5p
CTSS	hsa-miR-20b-5p
S1PR3	hsa-miR-20b-5p
EIF4G2	hsa-miR-20b-5p
EPHA5	hsa-miR-20b-5p
ERBB3	hsa-miR-20b-5p
EREG	hsa-miR-20b-5p
ESR1	hsa-miR-20b-5p
ETV1	hsa-miR-20b-5p
F3	hsa-miR-20b-5p
GJA1	hsa-miR-20b-5p
GOLGA1	hsa-miR-20b-5p
HLF	hsa-miR-20b-5p
JAK1	hsa-miR-20b-5p
LDLR	hsa-miR-20b-5p
LIMK1	hsa-miR-20b-5p
SMAD5	hsa-miR-20b-5p
SMAD7	hsa-miR-20b-5p
MCC	hsa-miR-20b-5p
MKLN1	hsa-miR-20b-5p
KMT2A	hsa-miR-20b-5p
MMP2	hsa-miR-20b-5p
MYCN	hsa-miR-20b-5p
NEUROG1	hsa-miR-20b-5p
NR4A2	hsa-miR-20b-5p
OCRL	hsa-miR-20b-5p
PAM	hsa-miR-20b-5p
PFN2	hsa-miR-20b-5p
PKD2	hsa-miR-20b-5p
PPP3CA	hsa-miR-20b-5p
PPP3R1	hsa-miR-20b-5p
PKN2	hsa-miR-20b-5p
MAPK1	hsa-miR-20b-5p
TWF1	hsa-miR-20b-5p
PURB	hsa-miR-20b-5p
RB1	hsa-miR-20b-5p
RBL2	hsa-miR-20b-5p
REST	hsa-miR-20b-5p
RNF2	hsa-miR-20b-5p
RPA2	hsa-miR-20b-5p
RRM2	hsa-miR-20b-5p
SCN3A	hsa-miR-20b-5p
CXCL6	hsa-miR-20b-5p
SOD2	hsa-miR-20b-5p
SORL1	hsa-miR-20b-5p
TBL1X	hsa-miR-20b-5p
TGFBR2	hsa-miR-20b-5p
KLF10	hsa-miR-20b-5p
TLE4	hsa-miR-20b-5p
TPM3	hsa-miR-20b-5p
UCP3	hsa-miR-20b-5p
VLDLR	hsa-miR-20b-5p
ZNF148	hsa-miR-20b-5p
ZXDA	hsa-miR-20b-5p
PXDN	hsa-miR-20b-5p
FZD3	hsa-miR-20b-5p
ST8SIA2	hsa-miR-20b-5p
NCOA3	hsa-miR-20b-5p
FZD6	hsa-miR-20b-5p
ULK1	hsa-miR-20b-5p
DGKE	hsa-miR-20b-5p
TNFSF11	hsa-miR-20b-5p
GBF1	hsa-miR-20b-5p
ADAM9	hsa-miR-20b-5p
MBD2	hsa-miR-20b-5p
REPS2	hsa-miR-20b-5p
TRIP11	hsa-miR-20b-5p
SPTLC2	hsa-miR-20b-5p
GOSR1	hsa-miR-20b-5p
GABBR2	hsa-miR-20b-5p
ENTPD4	hsa-miR-20b-5p
NCOR1	hsa-miR-20b-5p
UBE3C	hsa-miR-20b-5p
CEP57	hsa-miR-20b-5p
ARL4C	hsa-miR-20b-5p
ARL4A	hsa-miR-20b-5p
TIMM17A	hsa-miR-20b-5p
POLQ	hsa-miR-20b-5p
MAP3K2	hsa-miR-20b-5p
WASF3	hsa-miR-20b-5p
FGL2	hsa-miR-20b-5p
INPP5F	hsa-miR-20b-5p
TMCC1	hsa-miR-20b-5p
ERC1	hsa-miR-20b-5p
SPG20	hsa-miR-20b-5p
TBC1D9	hsa-miR-20b-5p
RGL1	hsa-miR-20b-5p
FBXW11	hsa-miR-20b-5p
U2SURP	hsa-miR-20b-5p
FBXL5	hsa-miR-20b-5p
NBEA	hsa-miR-20b-5p
TNFRSF21	hsa-miR-20b-5p
OSTM1	hsa-miR-20b-5p
RACGAP1	hsa-miR-20b-5p
YPEL1	hsa-miR-20b-5p
SNX11	hsa-miR-20b-5p
MDFIC	hsa-miR-20b-5p
SAR1B	hsa-miR-20b-5p
IRAK4	hsa-miR-20b-5p
CRIM1	hsa-miR-20b-5p
PRR16	hsa-miR-20b-5p
CDC40	hsa-miR-20b-5p
SUCO	hsa-miR-20b-5p
ZAK	hsa-miR-20b-5p
BRWD1	hsa-miR-20b-5p
CCSER2	hsa-miR-20b-5p
XRN1	hsa-miR-20b-5p
SGTB	hsa-miR-20b-5p
INO80	hsa-miR-20b-5p
CROT	hsa-miR-20b-5p
AGGF1	hsa-miR-20b-5p
VPS53	hsa-miR-20b-5p
CAMK2N1	hsa-miR-20b-5p
TRPV6	hsa-miR-20b-5p
BTBD7	hsa-miR-20b-5p
CSGALNACT1	hsa-miR-20b-5p
FOXJ2	hsa-miR-20b-5p
PCDHA6	hsa-miR-20b-5p
ANKH	hsa-miR-20b-5p
NRIP3	hsa-miR-20b-5p
PHTF2	hsa-miR-20b-5p
ZNFX1	hsa-miR-20b-5p
KIAA1191	hsa-miR-20b-5p
FAM219B	hsa-miR-20b-5p
RAB22A	hsa-miR-20b-5p
KIAA1377	hsa-miR-20b-5p
ZBTB4	hsa-miR-20b-5p
RRAGD	hsa-miR-20b-5p
ZNF667	hsa-miR-20b-5p
DMRTA2	hsa-miR-20b-5p
SMOC2	hsa-miR-20b-5p
TBC1D15	hsa-miR-20b-5p
PHACTR4	hsa-miR-20b-5p
RASL11B	hsa-miR-20b-5p
TMUB2	hsa-miR-20b-5p
C10orf76	hsa-miR-20b-5p
PPP1R3B	hsa-miR-20b-5p
CYBRD1	hsa-miR-20b-5p
CSRNP3	hsa-miR-20b-5p
WDR82	hsa-miR-20b-5p
ZFP91	hsa-miR-20b-5p
TM2D2	hsa-miR-20b-5p
GINS4	hsa-miR-20b-5p
LCOR	hsa-miR-20b-5p
PLEKHA8	hsa-miR-20b-5p
HAUS8	hsa-miR-20b-5p
TP53INP1	hsa-miR-20b-5p
TMEM123	hsa-miR-20b-5p
NIPA1	hsa-miR-20b-5p
C1orf173	hsa-miR-20b-5p
KCTD18	hsa-miR-20b-5p
PPARGC1B	hsa-miR-20b-5p
SRSF12	hsa-miR-20b-5p
MUM1L1	hsa-miR-20b-5p
ZNF280B	hsa-miR-20b-5p
SAMD8	hsa-miR-20b-5p
FAM117B	hsa-miR-20b-5p
CREBRF	hsa-miR-20b-5p
C7orf60	hsa-miR-20b-5p
DENND5B	hsa-miR-20b-5p
ITPRIPL2	hsa-miR-20b-5p
TMEM64	hsa-miR-20b-5p
GLIS3	hsa-miR-20b-5p
PIKFYVE	hsa-miR-20b-5p
LRRC55	hsa-miR-20b-5p
JAZF1	hsa-miR-20b-5p
C7orf41	hsa-miR-20b-5p
MFSD8	hsa-miR-20b-5p
PGM2L1	hsa-miR-20b-5p
SLC46A3	hsa-miR-20b-5p
FAM177A1	hsa-miR-20b-5p
SCARA5	hsa-miR-20b-5p
C12orf74	hsa-miR-20b-5p
PLCXD3	hsa-miR-20b-5p
ZNF445	hsa-miR-20b-5p
SLC16A12	hsa-miR-20b-5p
FIBIN	hsa-miR-20b-5p
YPEL2	hsa-miR-20b-5p
FAM102A	hsa-miR-20b-5p
LHX8	hsa-miR-20b-5p
ACADSB	hsa-miR-20b-5p
CASP7	hsa-miR-20b-5p
DMP1	hsa-miR-20b-5p
FBLN1	hsa-miR-20b-5p
HIF1A	hsa-miR-20b-5p
IPP	hsa-miR-20b-5p
NFE2L1	hsa-miR-20b-5p
ATP8B1	hsa-miR-20b-5p
RBL1	hsa-miR-20b-5p
RNASEL	hsa-miR-20b-5p
SLC2A2	hsa-miR-20b-5p
SPN	hsa-miR-20b-5p
NR2C1	hsa-miR-20b-5p
REEP5	hsa-miR-20b-5p
SERF1A	hsa-miR-20b-5p
PDLIM4	hsa-miR-20b-5p
CPNE1	hsa-miR-20b-5p
MFHAS1	hsa-miR-20b-5p
UTP14C	hsa-miR-20b-5p
CHAF1A	hsa-miR-20b-5p
TRIM22	hsa-miR-20b-5p
BTN3A2	hsa-miR-20b-5p
MLXIP	hsa-miR-20b-5p
CLSTN1	hsa-miR-20b-5p
MLC1	hsa-miR-20b-5p
ZFR2	hsa-miR-20b-5p
ANKRD28	hsa-miR-20b-5p
SZT2	hsa-miR-20b-5p
MTCH2	hsa-miR-20b-5p
GPR82	hsa-miR-20b-5p
GOLM1	hsa-miR-20b-5p
CCDC93	hsa-miR-20b-5p
CRLS1	hsa-miR-20b-5p
PGPEP1	hsa-miR-20b-5p
TBC1D8B	hsa-miR-20b-5p
RNF125	hsa-miR-20b-5p
IPO9	hsa-miR-20b-5p
LRP2BP	hsa-miR-20b-5p
PCDHAC2	hsa-miR-20b-5p
PCDHAC1	hsa-miR-20b-5p
PCDHA13	hsa-miR-20b-5p
PCDHA12	hsa-miR-20b-5p
PCDHA10	hsa-miR-20b-5p
PCDHA8	hsa-miR-20b-5p
PCDHA7	hsa-miR-20b-5p
PCDHA5	hsa-miR-20b-5p
PCDHA4	hsa-miR-20b-5p
PCDHA3	hsa-miR-20b-5p
PCDHA2	hsa-miR-20b-5p
PCDHA1	hsa-miR-20b-5p
KIAA1244	hsa-miR-20b-5p
HRH4	hsa-miR-20b-5p
OPA3	hsa-miR-20b-5p
RAB11FIP1	hsa-miR-20b-5p
SETDB2	hsa-miR-20b-5p
MCHR2	hsa-miR-20b-5p
SIGLEC10	hsa-miR-20b-5p
DPH6	hsa-miR-20b-5p
RCCD1	hsa-miR-20b-5p
PIGM	hsa-miR-20b-5p
FOXQ1	hsa-miR-20b-5p
GALNT15	hsa-miR-20b-5p
EID2B	hsa-miR-20b-5p
PTGR2	hsa-miR-20b-5p
C2CD4A	hsa-miR-20b-5p
TMEM56	hsa-miR-20b-5p
C3orf55	hsa-miR-20b-5p
FAM218A	hsa-miR-20b-5p
ZDHHC15	hsa-miR-20b-5p
FBXO39	hsa-miR-20b-5p
ZNF320	hsa-miR-20b-5p
KANK4	hsa-miR-20b-5p
MMAA	hsa-miR-20b-5p
LRRC45	hsa-miR-20b-5p
LRRC57	hsa-miR-20b-5p
SUMF1	hsa-miR-20b-5p
DDX51	hsa-miR-20b-5p
CCDC137	hsa-miR-20b-5p
PDDC1	hsa-miR-20b-5p
LRRC10	hsa-miR-20b-5p
APOBEC4	hsa-miR-20b-5p
NUTM2G	hsa-miR-20b-5p
SERF1B	hsa-miR-20b-5p
CNTNAP3B	hsa-miR-20b-5p
FAM47E-STBD1	hsa-miR-20b-5p
TERF2	hsa-miR-363-5p
TRAPPC10	hsa-miR-363-5p
TNNI1	hsa-miR-363-5p
FOSL1	hsa-miR-363-5p
HIST2H2BE	hsa-miR-363-5p
KALRN	hsa-miR-363-5p
GPD1L	hsa-miR-363-5p
METTL21B	hsa-miR-363-5p
DGCR8	hsa-miR-363-5p
RBFOX1	hsa-miR-363-5p
ISLR2	hsa-miR-363-5p
LHPP	hsa-miR-363-5p
ADAMTS17	hsa-miR-363-5p
ADAMTS19	hsa-miR-363-5p
COL4A4	hsa-miR-363-5p
CREBBP	hsa-miR-363-5p
GNG4	hsa-miR-363-5p
MGAT3	hsa-miR-363-5p
SLC9A2	hsa-miR-363-5p
RBM19	hsa-miR-363-5p
BTN3A1	hsa-miR-363-5p
MMACHC	hsa-miR-363-5p
OGFOD3	hsa-miR-363-5p
ISCA1	hsa-miR-363-5p
ZNF587	hsa-miR-363-5p
ORAOV1	hsa-miR-363-5p
MPV17L	hsa-miR-363-5p
TRIM67	hsa-miR-363-5p
KPRP	hsa-miR-363-5p
ARF4	hsa-miR-371b-5p
ATP2B4	hsa-miR-371b-5p
CREB1	hsa-miR-371b-5p
FKBP4	hsa-miR-371b-5p
ARHGAP35	hsa-miR-371b-5p
HOXB5	hsa-miR-371b-5p
KCND2	hsa-miR-371b-5p
NF2	hsa-miR-371b-5p
PRKCA	hsa-miR-371b-5p
ALDH18A1	hsa-miR-371b-5p
RAP1A	hsa-miR-371b-5p
RLF	hsa-miR-371b-5p
BRD2	hsa-miR-371b-5p
SCN9A	hsa-miR-371b-5p
SYT4	hsa-miR-371b-5p
TFAP4	hsa-miR-371b-5p
VCP	hsa-miR-371b-5p
ZIC2	hsa-miR-371b-5p
USP7	hsa-miR-371b-5p
RAB11A	hsa-miR-371b-5p
SGPL1	hsa-miR-371b-5p
BUB3	hsa-miR-371b-5p
PTER	hsa-miR-371b-5p
MLEC	hsa-miR-371b-5p
EFCAB14	hsa-miR-371b-5p
MAFB	hsa-miR-371b-5p
AMMECR1	hsa-miR-371b-5p
TOB1	hsa-miR-371b-5p
KDELR1	hsa-miR-371b-5p
KIF3A	hsa-miR-371b-5p
BAZ1A	hsa-miR-371b-5p
RASSF8	hsa-miR-371b-5p
USP22	hsa-miR-371b-5p
CLEC5A	hsa-miR-371b-5p
ARFIP1	hsa-miR-371b-5p
SH3GLB1	hsa-miR-371b-5p
RLIM	hsa-miR-371b-5p
TRIM33	hsa-miR-371b-5p
CCNJ	hsa-miR-371b-5p
AFTPH	hsa-miR-371b-5p
CASZ1	hsa-miR-371b-5p
ELOVL2	hsa-miR-371b-5p
N4BP2	hsa-miR-371b-5p
RALGAPB	hsa-miR-371b-5p
PELI1	hsa-miR-371b-5p
DSCAML1	hsa-miR-371b-5p
NUFIP2	hsa-miR-371b-5p
ZBTB2	hsa-miR-371b-5p
CREBZF	hsa-miR-371b-5p
C6orf106	hsa-miR-371b-5p
NABP1	hsa-miR-371b-5p
PARP8	hsa-miR-371b-5p
TBL1XR1	hsa-miR-371b-5p
MOB3B	hsa-miR-371b-5p
SIKE1	hsa-miR-371b-5p
NAA50	hsa-miR-371b-5p
KLHL15	hsa-miR-371b-5p
NDFIP1	hsa-miR-371b-5p
ARID5B	hsa-miR-371b-5p
MRFAP1	hsa-miR-371b-5p
KCTD12	hsa-miR-371b-5p
SSX2IP	hsa-miR-371b-5p
SPATA5	hsa-miR-371b-5p
PTPLB	hsa-miR-371b-5p
KHDRBS2	hsa-miR-371b-5p
C2orf69	hsa-miR-371b-5p
ZCCHC24	hsa-miR-371b-5p
SLC41A1	hsa-miR-371b-5p
ADRBK2	hsa-miR-371b-5p
AP1G1	hsa-miR-371b-5p
ARHGAP5	hsa-miR-371b-5p
CACNA1D	hsa-miR-371b-5p
CBL	hsa-miR-371b-5p
CCNT2	hsa-miR-371b-5p
DCC	hsa-miR-371b-5p
ELAVL2	hsa-miR-371b-5p
EN2	hsa-miR-371b-5p
GLG1	hsa-miR-371b-5p
GRM5	hsa-miR-371b-5p
MBP	hsa-miR-371b-5p
NFIB	hsa-miR-371b-5p
PPM1A	hsa-miR-371b-5p
PPP4C	hsa-miR-371b-5p
TRA2B	hsa-miR-371b-5p
SLC8A1	hsa-miR-371b-5p
SS18	hsa-miR-371b-5p
SURF4	hsa-miR-371b-5p
RNGTT	hsa-miR-371b-5p
ST3GAL5	hsa-miR-371b-5p
LRRFIP2	hsa-miR-371b-5p
HDAC9	hsa-miR-371b-5p
SERTAD2	hsa-miR-371b-5p
IGF2BP3	hsa-miR-371b-5p
SPIN1	hsa-miR-371b-5p
NUDT21	hsa-miR-371b-5p
SAMD4A	hsa-miR-371b-5p
KDM4C	hsa-miR-371b-5p
SNX13	hsa-miR-371b-5p
GSE1	hsa-miR-371b-5p
GCA	hsa-miR-371b-5p
TENM4	hsa-miR-371b-5p
TNRC6A	hsa-miR-371b-5p
PCLO	hsa-miR-371b-5p
DCUN1D1	hsa-miR-371b-5p
WDR44	hsa-miR-371b-5p
ZNF280D	hsa-miR-371b-5p
TULP4	hsa-miR-371b-5p
ARHGAP21	hsa-miR-371b-5p
RANBP10	hsa-miR-371b-5p
MPP5	hsa-miR-371b-5p
UPF3A	hsa-miR-371b-5p
NETO1	hsa-miR-371b-5p
SETD3	hsa-miR-371b-5p
HOOK3	hsa-miR-371b-5p
ARAP2	hsa-miR-371b-5p
ZNF831	hsa-miR-371b-5p
TET3	hsa-miR-371b-5p
YTHDF3	hsa-miR-371b-5p
UBN2	hsa-miR-371b-5p
