# Supplementary material for: Distinct MicroRNA Expression Signatures of Porcine Induced Pluripotent Stem Cells under Mouse and Human ESC Culture Conditions
Source: PLoS One. 2016 Jul 6;11(7):e0158655. doi: 10.1371/journal.pone.0158655 (PMC4934789; doi:10.1371/journal.pone.0158655)
Supplement: S4 File — (XLSX) [file pone.0158655.s005.xlsx]

## Sheet: overley
ssc_18166
ssc_20625
ssc_38549
ssc_35051
ssc_19974
ssc_34159
ssc_33611
ssc_34233
ssc_18589
ssc_38503
ssc_31616
ssc_23562
ssc_7012
ssc_6375
ssc_5584
ssc_5583
ssc_24677
ssc_1485
ssc_3206
ssc_28655
ssc_27933
ssc_39150
ssc_8902
ssc_15631
ssc_38629
ssc_6519
ssc_6520
ssc_38630
ssc_33793
ssc_30073
ssc_22218
ssc_26524
ssc_21324
ssc_9029
ssc_35379
ssc_33981
ssc_33086
ssc_38540
ssc_21494
ssc_20369
ssc_28124
ssc_2987
ssc_9104
ssc_11177
ssc_37502
ssc_25174
ssc_5675
ssc_38737
ssc_36259
ssc_32953
ssc_34176
ssc_11054
ssc_30544
ssc_36283
ssc_35045_x4000
ssc_32296
ssc_26661
ssc_29215
ssc_38645
ssc_28124_x4000
ssc_22657
ssc_32729
ssc_20488
ssc_34699
ssc_36754
ssc_35897
ssc_27579
ssc_33903
ssc_33899
ssc_38629_x4000
ssc_6519_x4000
ssc_26524_x4000
ssc_26670
ssc_11158
ssc_33496_x4000
ssc_19539
ssc_35044
ssc_35045
ssc_11564_x4000
ssc_27916
ssc_27915
ssc_33115
ssc_32144

## Sheet: hpips
ssc_36394
ssc_31387
ssc_18143
ssc_20340
ssc_25717
ssc_30030
ssc_33647
ssc_34176_
ssc_21503
ssc_31500
ssc_26246
ssc_37968
ssc_37764
ssc_22670
ssc_22567
ssc_34860
ssc_31503
ssc_32665
ssc_4964
ssc_12603
ssc_22940
ssc_28709
ssc_148
ssc_31819
ssc_2467
ssc_31915
ssc_7832
ssc_5839
ssc_39039
ssc_3750
ssc_4245
ssc_9773
ssc_17164
ssc_21015
ssc_12127
ssc_38503
ssc_31616_x4000
ssc_21206
ssc_6462
ssc_6464
ssc_16037
ssc_27433
ssc_31100
ssc_31611
ssc_38508
ssc_8013
ssc_24632
ssc_23021
ssc_23019
ssc_13736
ssc_28451
ssc_27746
ssc_35996
ssc_19369
ssc_26912
ssc_25717_x4000
ssc_10183
ssc_27426
ssc_27725
ssc_27174_x4000
ssc_38501
ssc_31618
ssc_16809
ssc_18244
ssc_10734
ssc_38538
ssc_8767
ssc_22448
ssc_26123
ssc_10958_x4000
ssc_20909
ssc_37751
ssc_16077
ssc_10278
ssc_1265_x4000
ssc_19416
ssc_11137
ssc_10537
ssc_9414
ssc_21293
ssc_17253
ssc_29975
ssc_27174
ssc_13652
ssc_21119
ssc_34159_x4000
ssc_33793_x4000
ssc_36468
ssc_9049
ssc_974
ssc_31525
ssc_8767_x4000
ssc_11044
ssc_35051_x4000
ssc_5164
ssc_1565
ssc_12580_x4000
ssc_7309
ssc_5839_x4000
ssc_34944

## Sheet: mpips
ssc_20330
ssc_38555
ssc_38576
ssc_38558
ssc_38544
ssc_22727
ssc_38541
ssc_123
ssc_38541_x4000
ssc_4789
ssc_38535
ssc_15021
ssc_16615
ssc_3341
ssc_38560
ssc_38535_x4000
ssc_9104_x4000
ssc_26330
ssc_24957
ssc_36515
ssc_13863
ssc_38562
ssc_12775
ssc_18123
ssc_11588
ssc_10489
ssc_39197
ssc_25144
ssc_36046
ssc_13441
ssc_33115_x4000
ssc_20067
ssc_15847
ssc_30286
ssc_30282
ssc_29000
ssc_33981_x4000
ssc_33086_x4000
ssc_11588_x4000
ssc_10489_x4000
ssc_8405
ssc_37076
ssc_22041
ssc_22042
ssc_13861
ssc_36329
ssc_3152
ssc_25100
ssc_18873
ssc_25283
ssc_26100
ssc_31840
ssc_5515
ssc_36445
ssc_19043
ssc_19974_x4000
ssc_11531
ssc_27515
ssc_35442
ssc_35444
ssc_8407
ssc_3748
ssc_37779
ssc_11564
ssc_10113
ssc_13804
ssc_8083
ssc_13441_x4000
ssc_11223
ssc_11224
ssc_38545_x4000
ssc_1308
ssc_1306
ssc_27971
ssc_25774
ssc_11061
ssc_11067
ssc_7687
ssc_16085
ssc_38529
ssc_11338
ssc_16757
ssc_220
ssc_17251
ssc_22165
ssc_33104
ssc_16586
ssc_21305
ssc_27706
ssc_23517
ssc_28815
ssc_5269
ssc_14273
ssc_24963
ssc_32100
ssc_20330_x4000
ssc_15713
ssc_38529_x4000
ssc_6462_x4000
ssc_28392
ssc_6212
ssc_17263
ssc_773
ssc_38554
ssc_34994
ssc_29511
ssc_7687_x4000
ssc_19971
ssc_9592
ssc_38096
ssc_22416
ssc_36306
ssc_38538_x4000
ssc_19305_x4000
ssc_33167
ssc_31084
ssc_31080
ssc_2762
ssc_27255
ssc_24404
ssc_25411
ssc_19305
ssc_31665
ssc_38770
ssc_11223_x4000
ssc_28846
ssc_37164
ssc_25579
ssc_38555_x4000
ssc_22174
